# Supplementary material for: Asymmetric synthesis of amino-benzothiazol derivatives by additions of 2-lithiated benzothiazoles to (S)-N-t-butylsulfinyl-ketimines
Source: Royal Society of Chemistry journal article supplement (doi:10.1039/c4ra15405c), 2014-12-04

## Supporting Information

### Asymmetric synthesis of amino-benzothiazol derivatives by additions of 2-lithiated benzothiazoles to (*S*)-*N*-*t*-butylsulfinyl-ketimines

Yanling Dai, Chen Xie, Lingmin Wu, Haibo Mei,\* Vadim A. Soloshonok, Jianlin Han,\*  
and Yi Pan

1. HPLC spectra of compounds 10.....S2
2. NMR spectra of compounds 8, 9 and 10.....S3

## 1. HPLC spectra of compounds 10

HPLC condition: The enantiomeric ratio was determined by HPLC with a Daicel Chiralpak IA column (Hexane: *i*-PrOH = 90:10, 1.0 mL/min, 254 nm,  $t_R$  (major) = 7.7 min,  $t_R$  (minor) = 9.4 min.)

HPLC spectrum of racemic 10

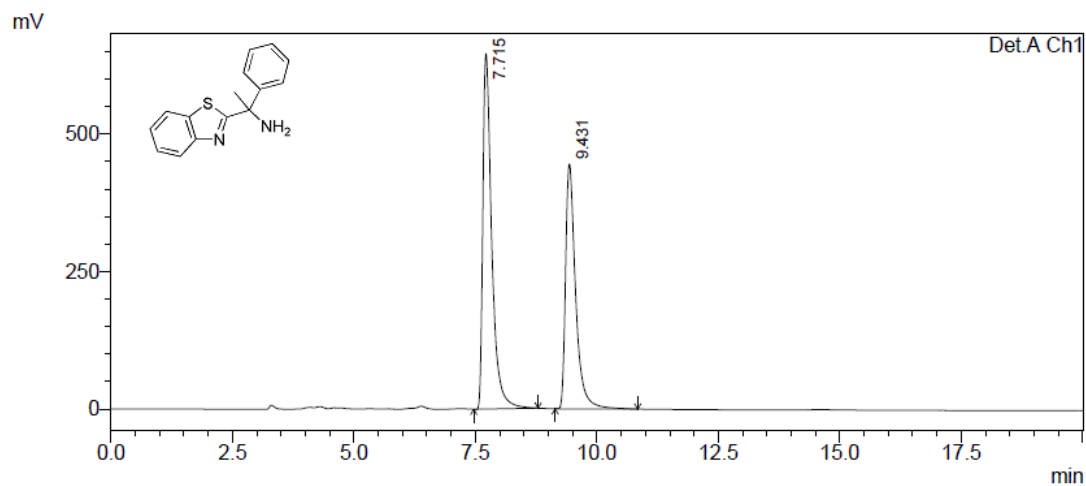

| Peak# | Ret. Time | Area     | Height  | Area %  | Height % |
|-------|-----------|----------|---------|---------|----------|
| 1     | 7.715     | 8255613  | 646552  | 56.313  | 59.199   |
| 2     | 9.431     | 6404495  | 445624  | 43.687  | 40.801   |
| Total |           | 14660108 | 1092176 | 100.000 | 100.000  |

HPLC spectrum of (*S*)-10

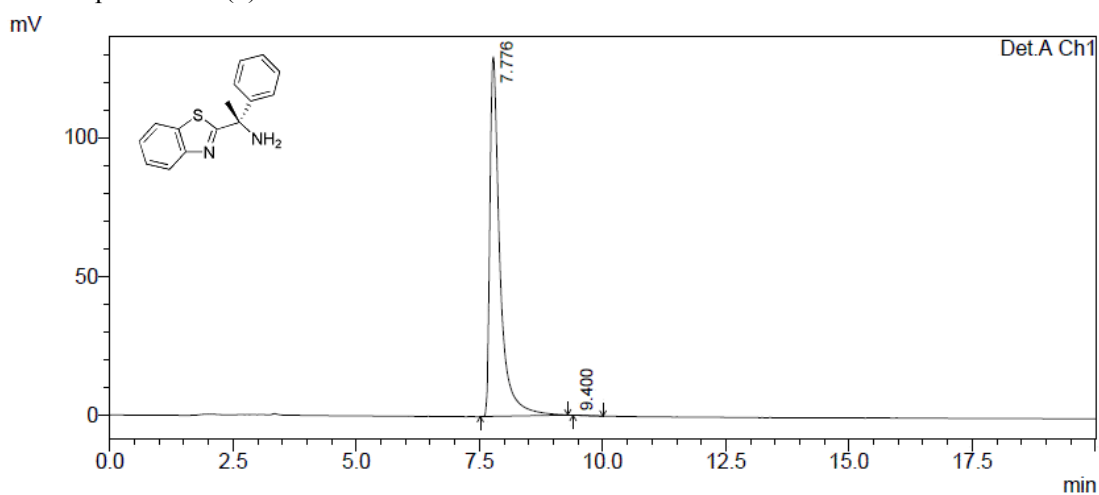

| Peak# | Ret. Time | Area    | Height | Area %  | Height % |
|-------|-----------|---------|--------|---------|----------|
| 1     | 7.776     | 1846671 | 129648 | 100.021 | 100.000  |
| 2     | 9.400     | -380    | 0      | -0.021  | 0.000    |
| Total |           | 1846291 | 129648 | 100.000 | 100.000  |

The 100% ee was found of (*S*)-10

## 2. NMR spectra of compounds 8, 9 and 10

$^1\text{H}$  NMR and  $^{13}\text{C}$  NMR R of 8a

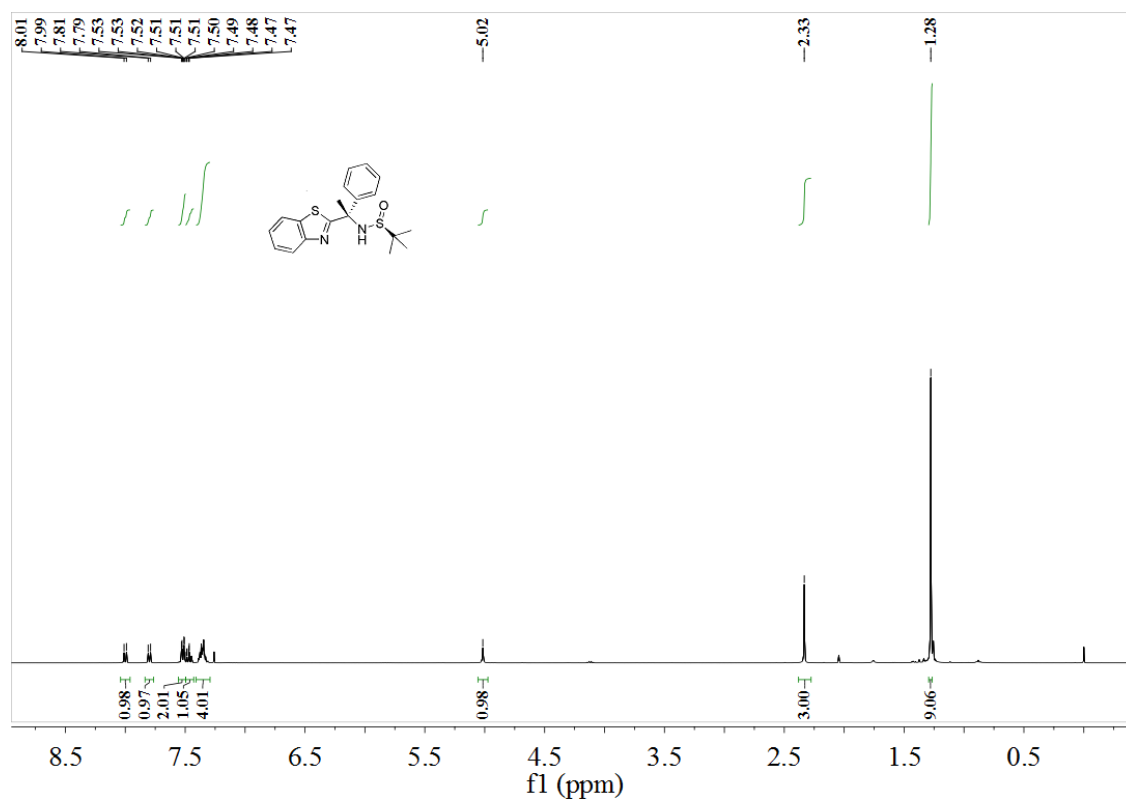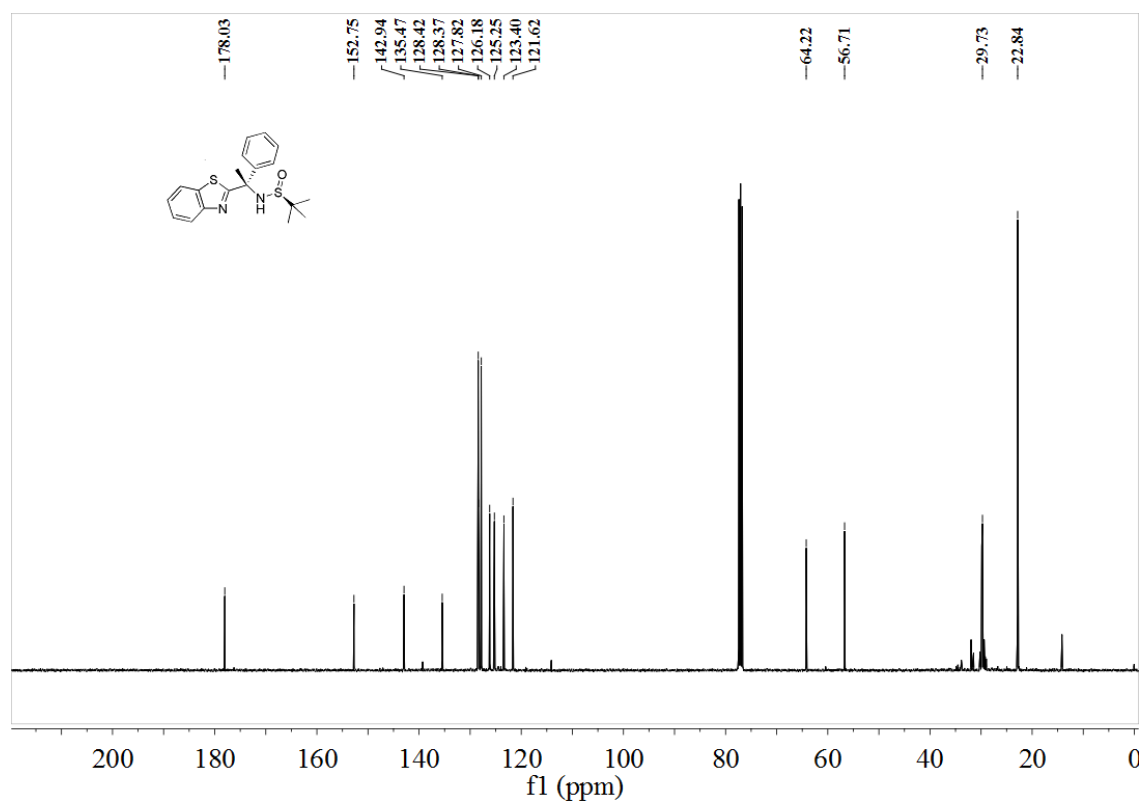

$^1\text{H}$  NMR,  $^{13}\text{C}$  NMR and  $^{19}\text{F}$  NMR of **8b**

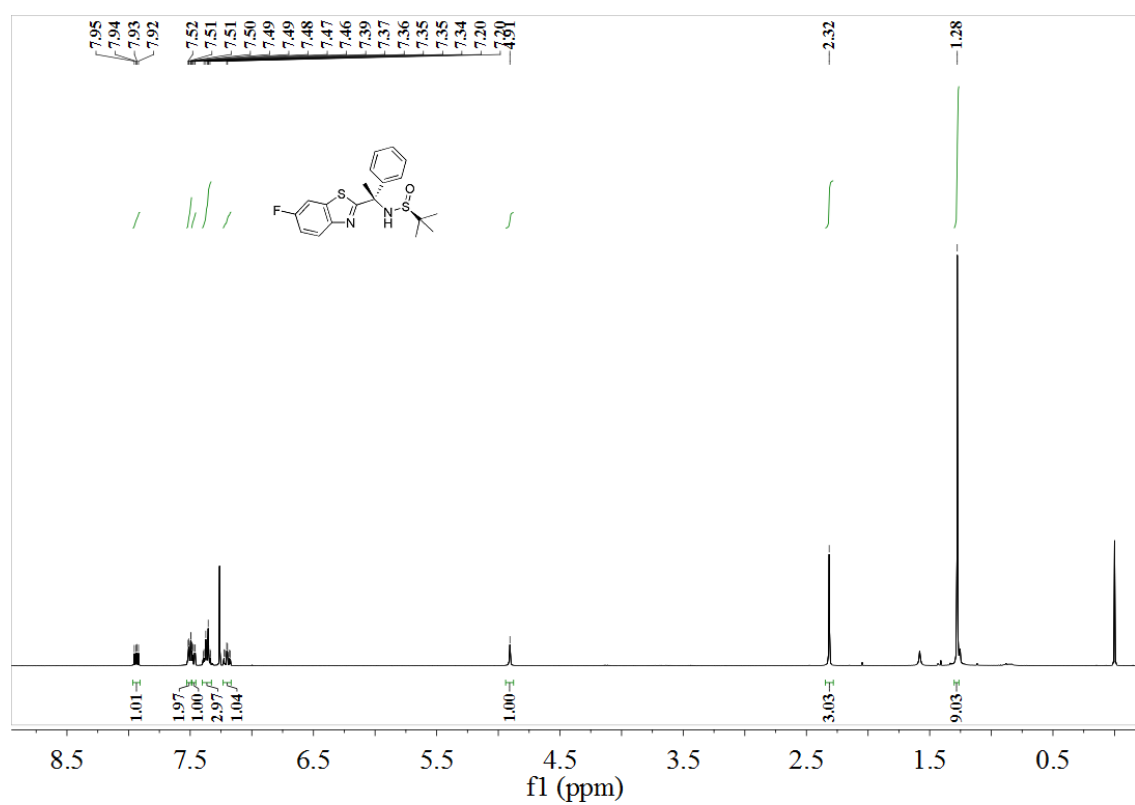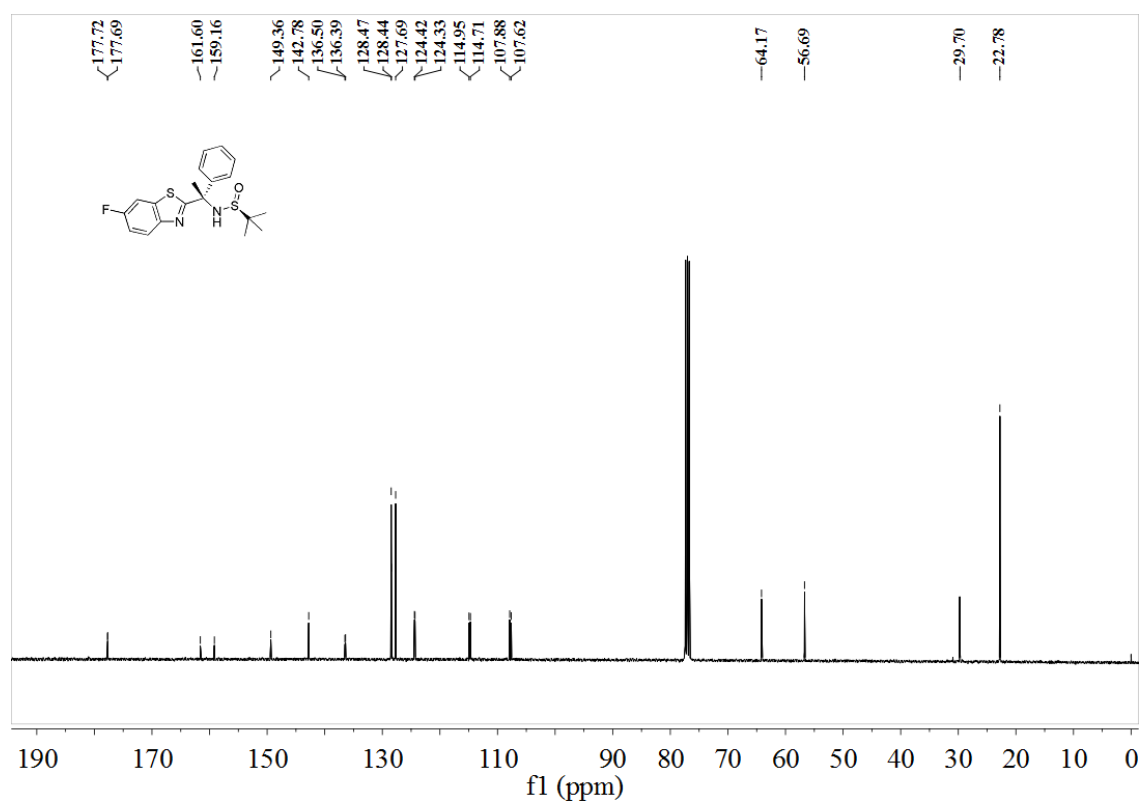

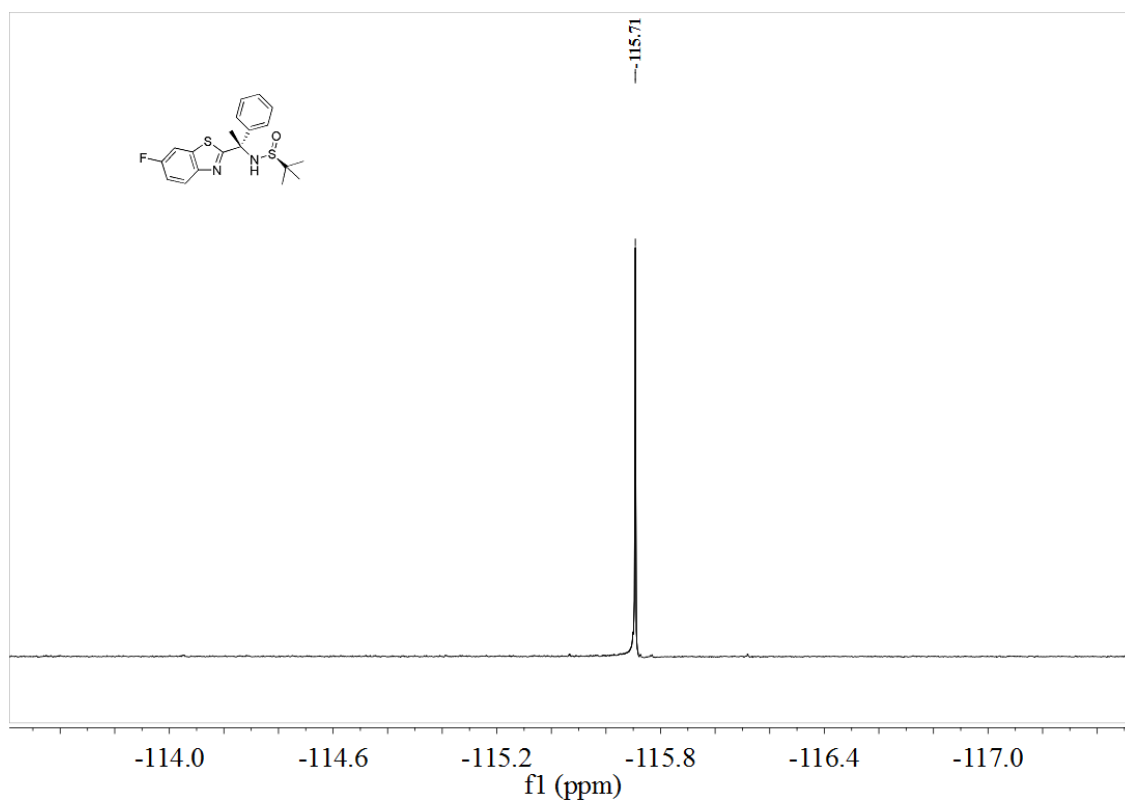

<sup>1</sup>H NMR and <sup>13</sup>C NMR of **8c**

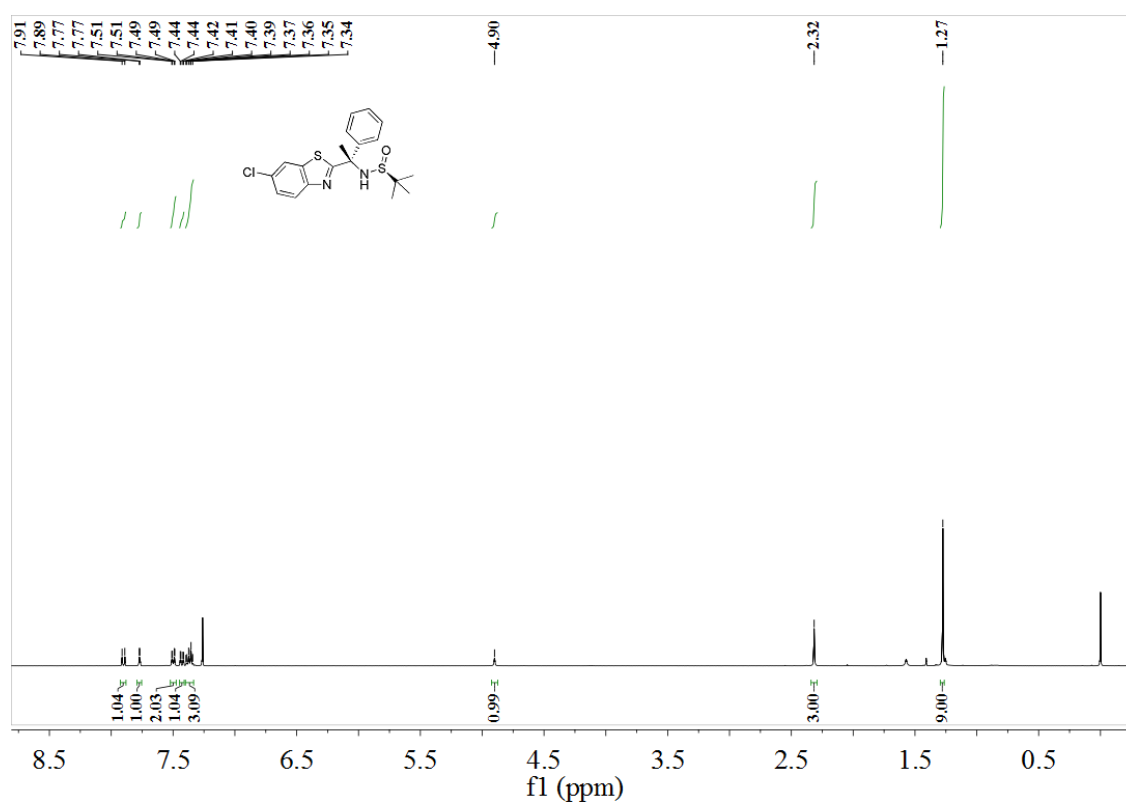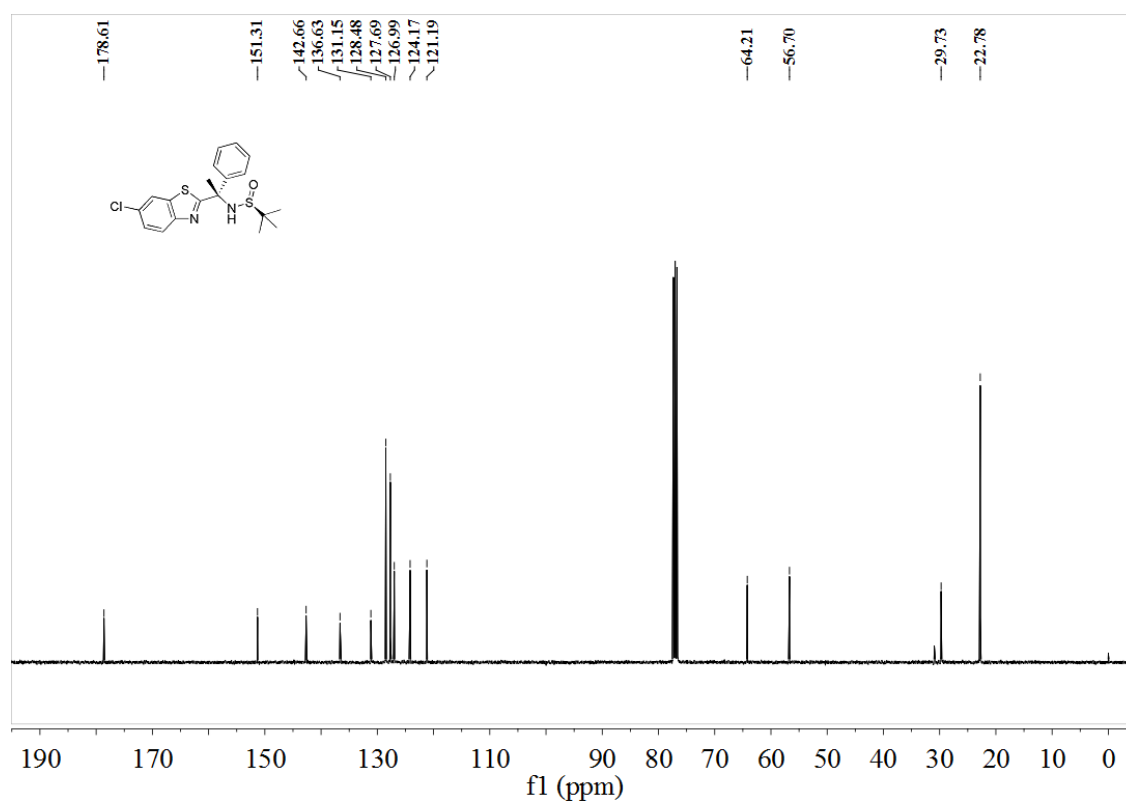

<sup>1</sup>H NMR and <sup>13</sup>C NMR of **8d**

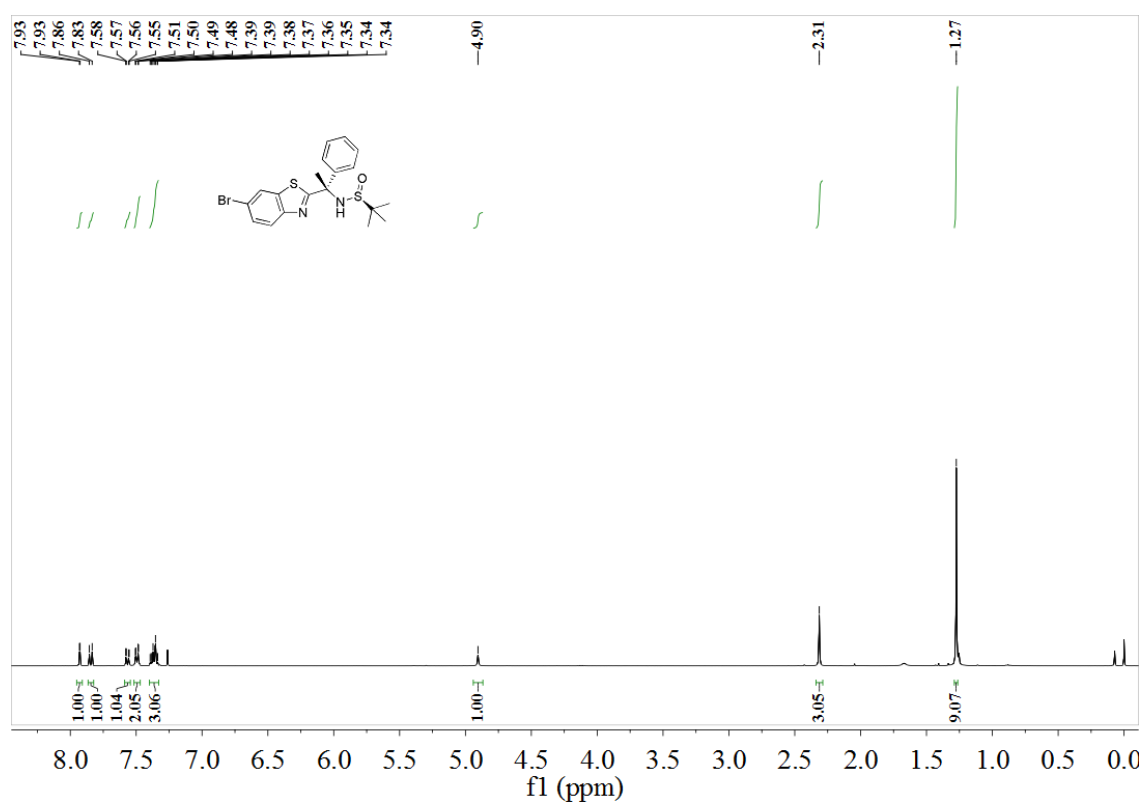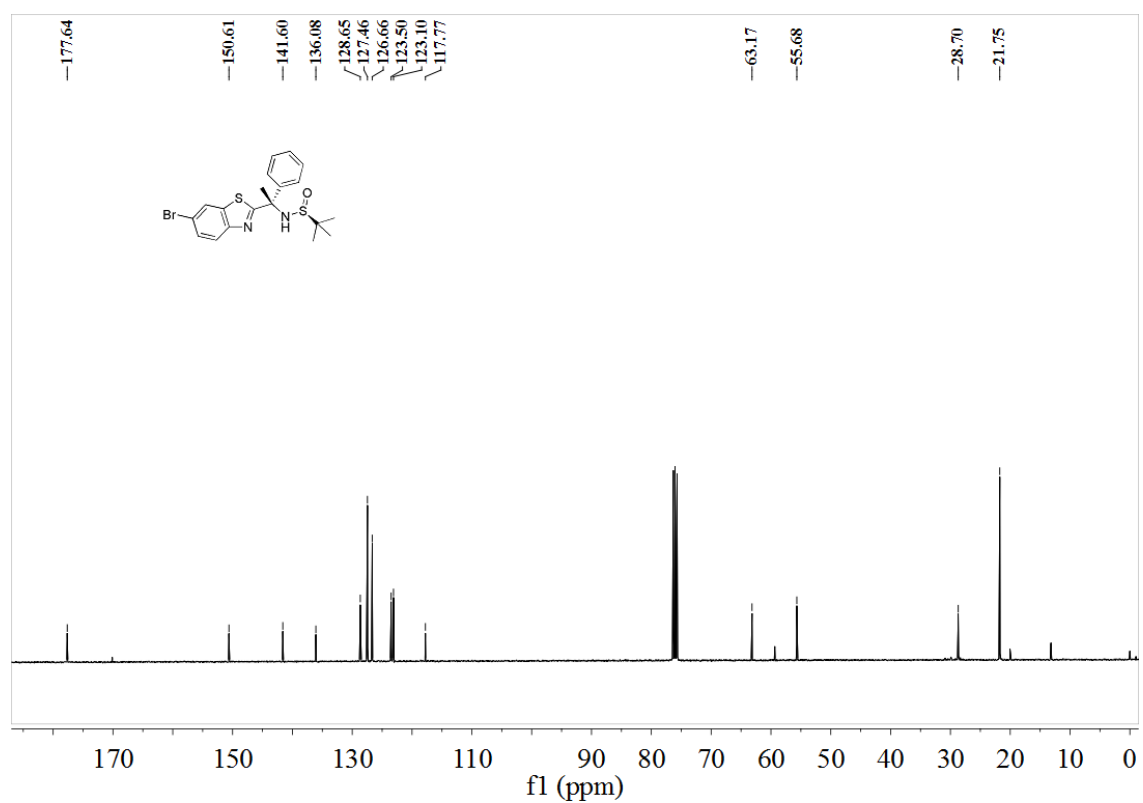

<sup>1</sup>H NMR and <sup>13</sup>C NMR of **8e**

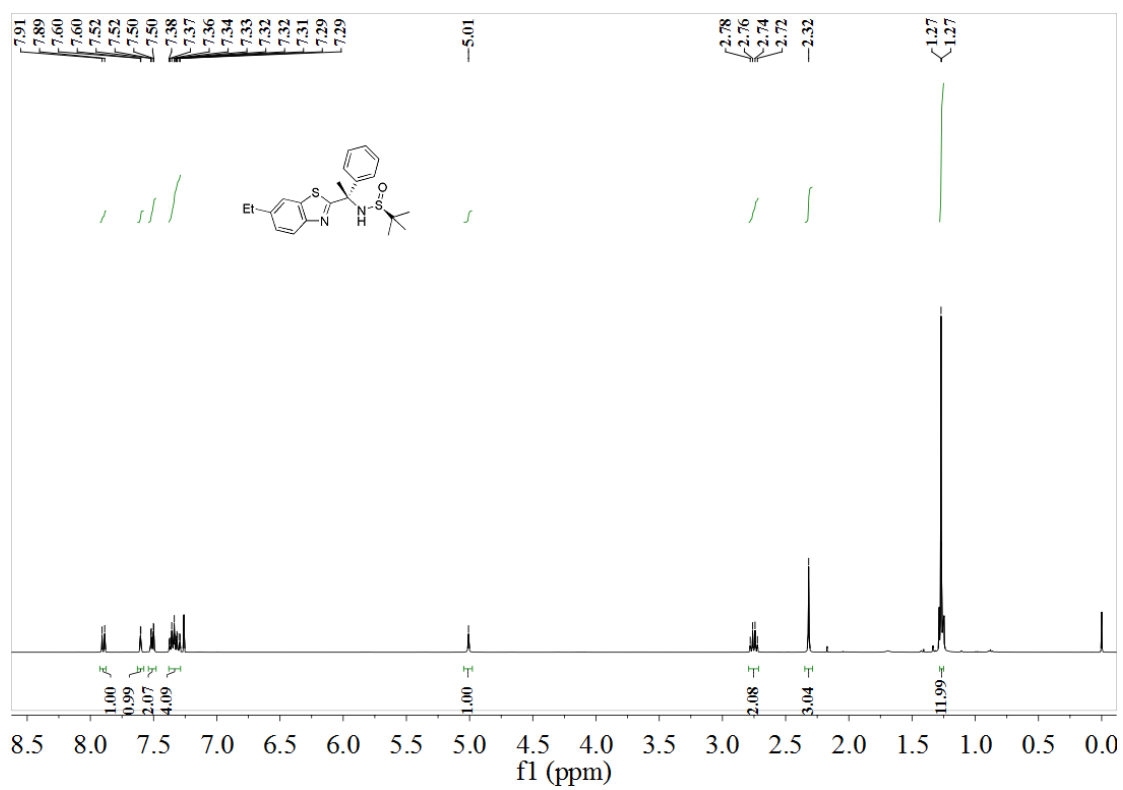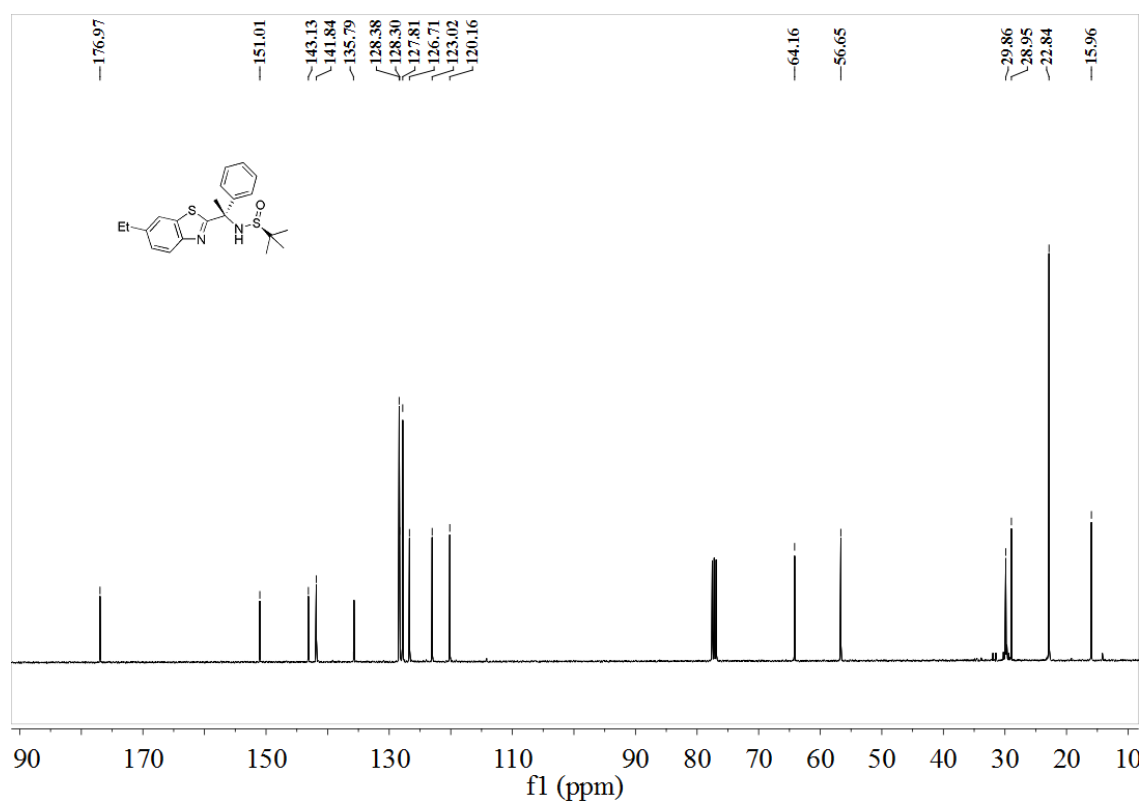



<sup>1</sup>H NMR and <sup>13</sup>C NMR of **8f**

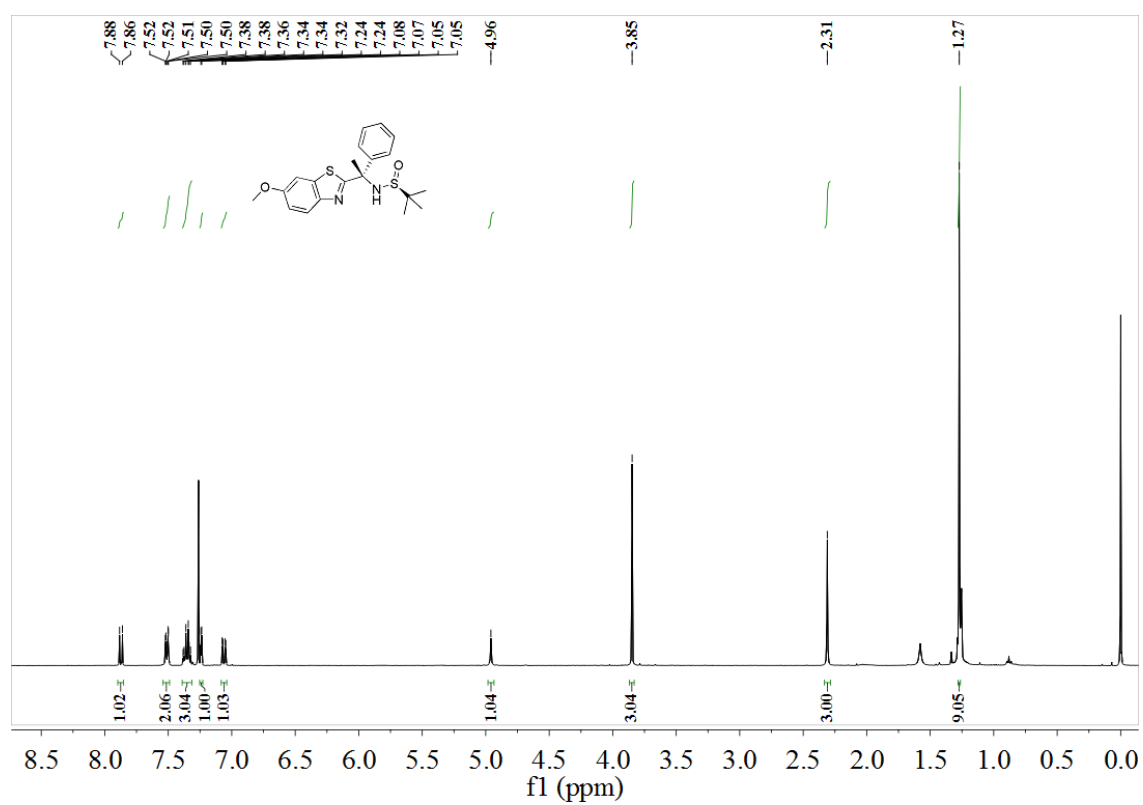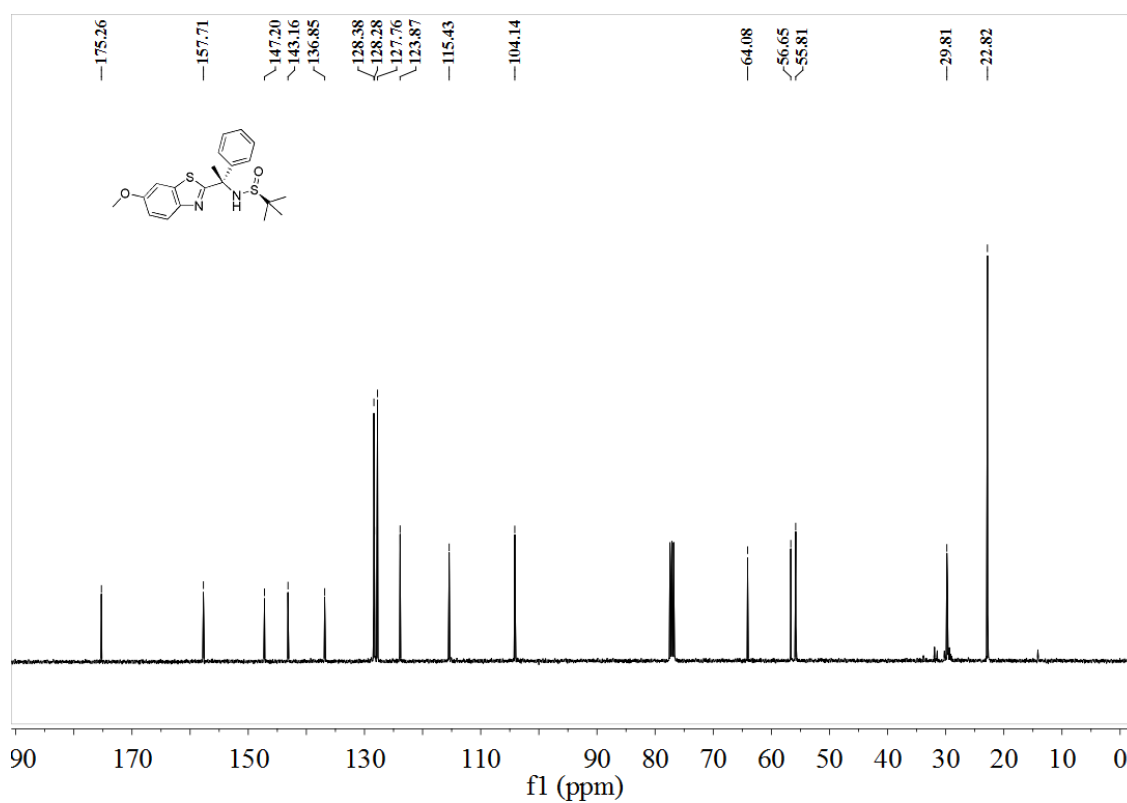

<sup>1</sup>H NMR and <sup>13</sup>C NMR of **8g**

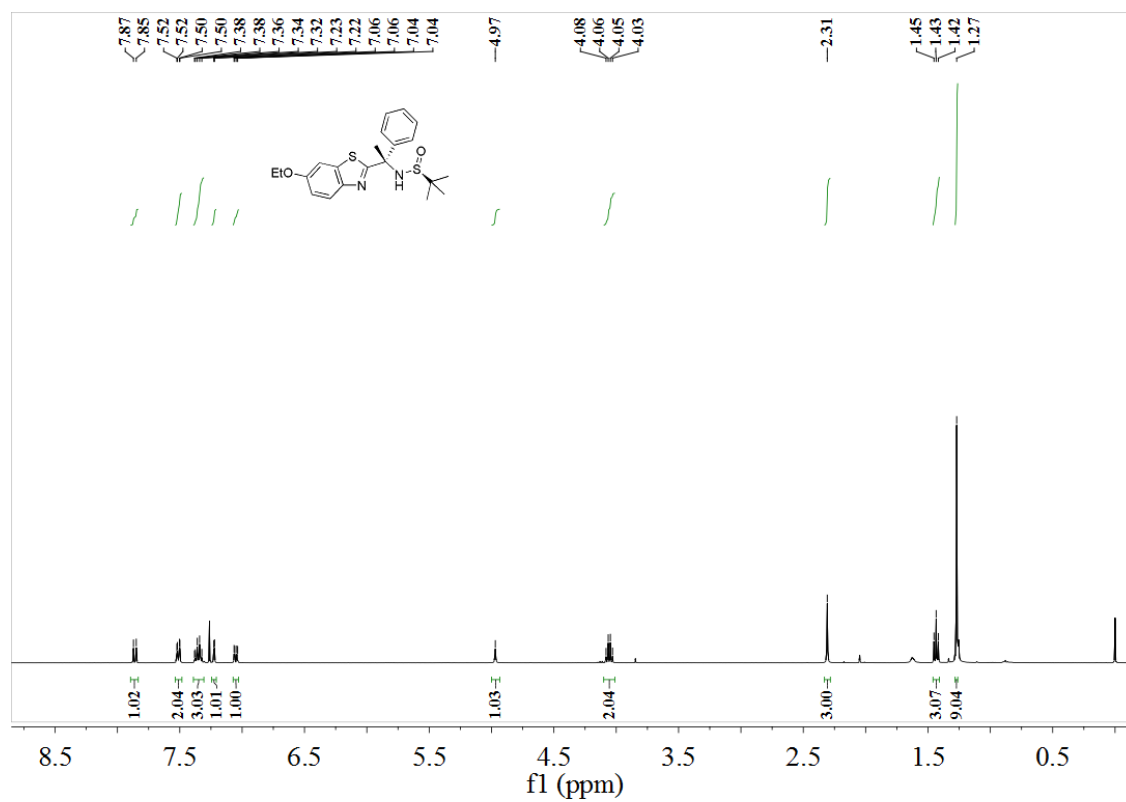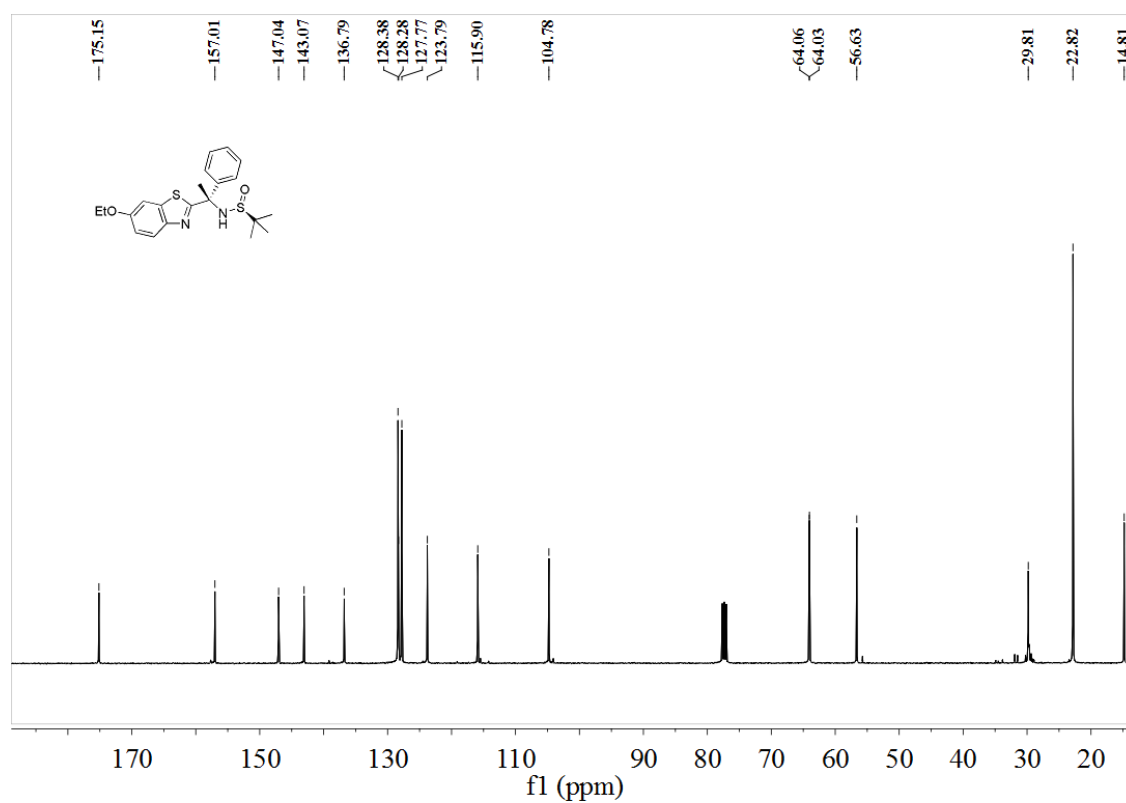

$^1\text{H}$  NMR and  $^{13}\text{C}$  NMR of **8h**

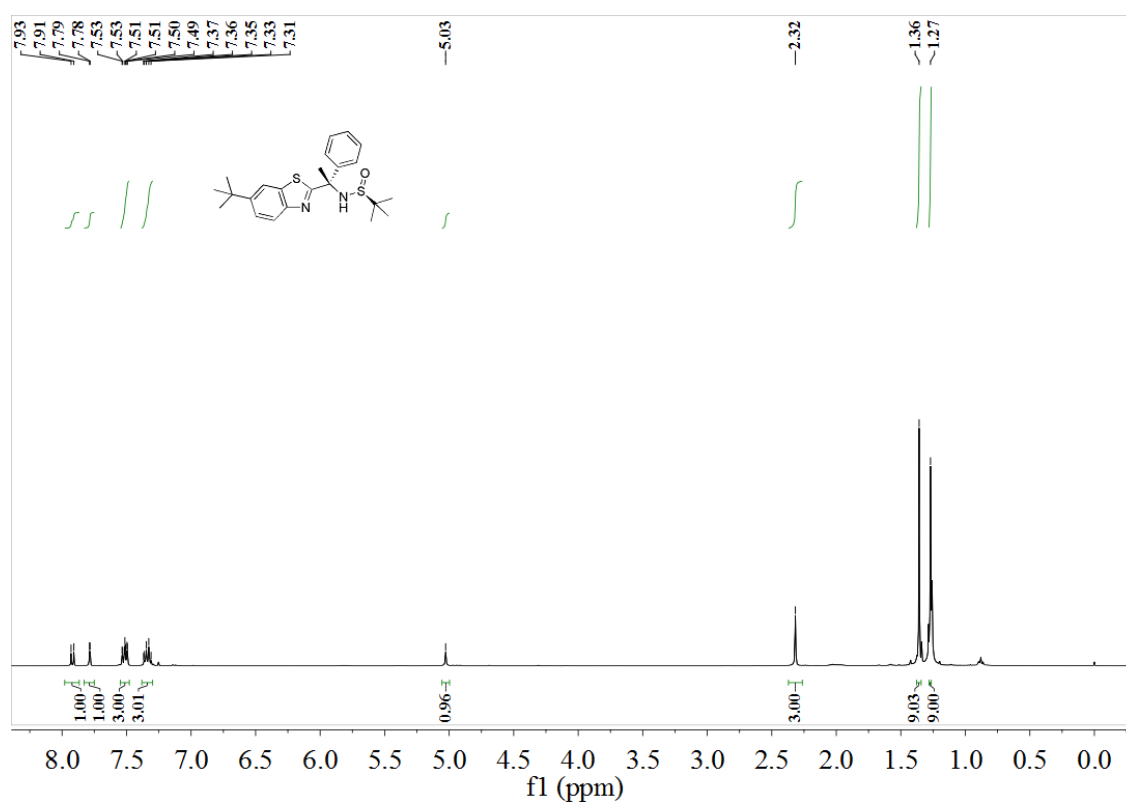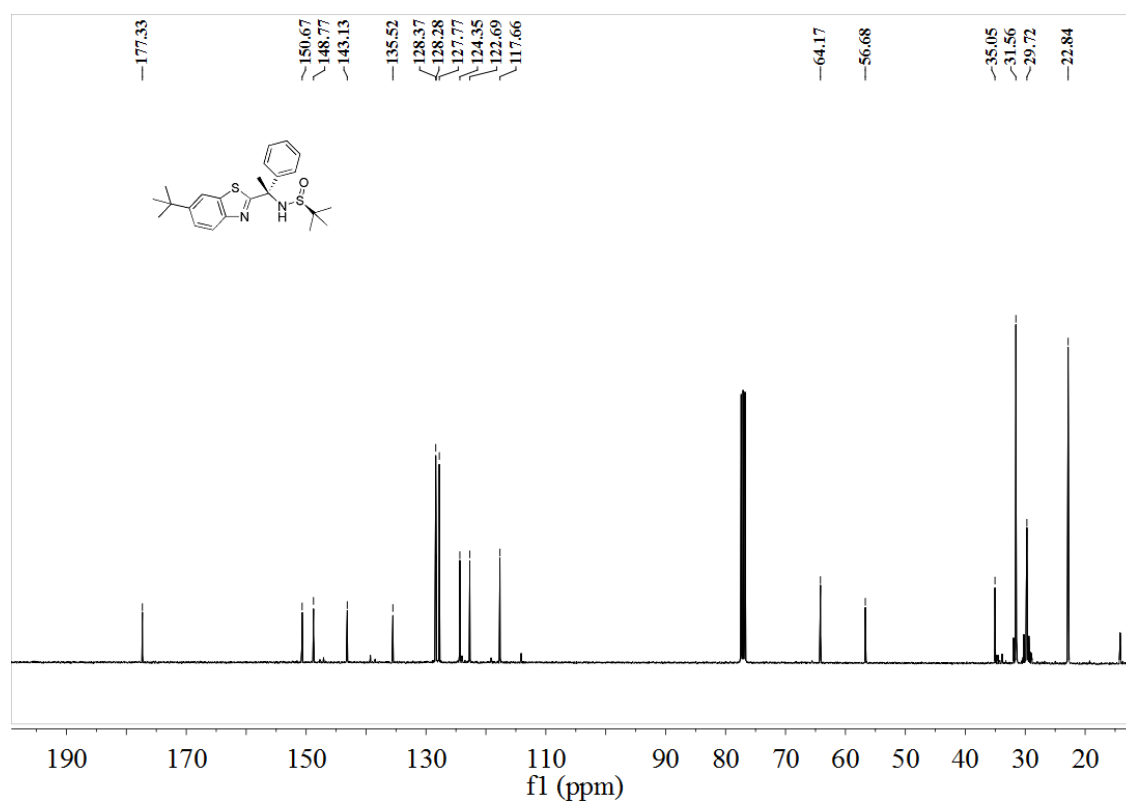

<sup>1</sup>H NMR and <sup>13</sup>C NMR R of **8i**

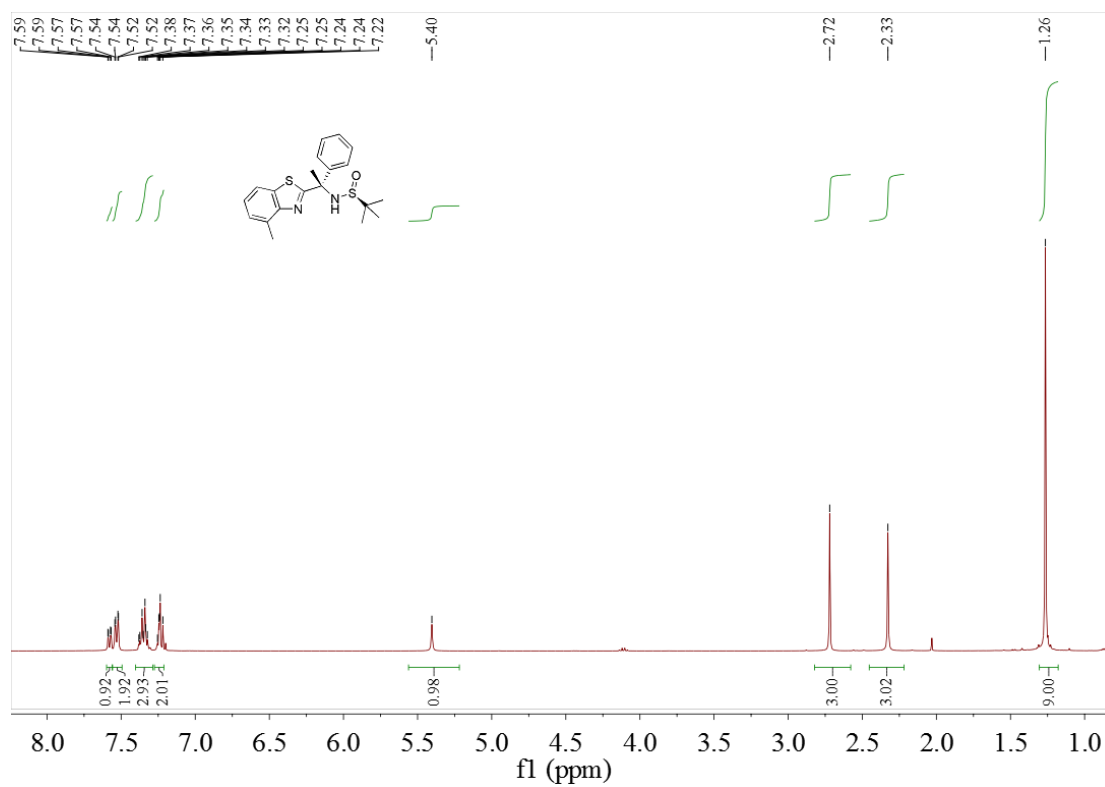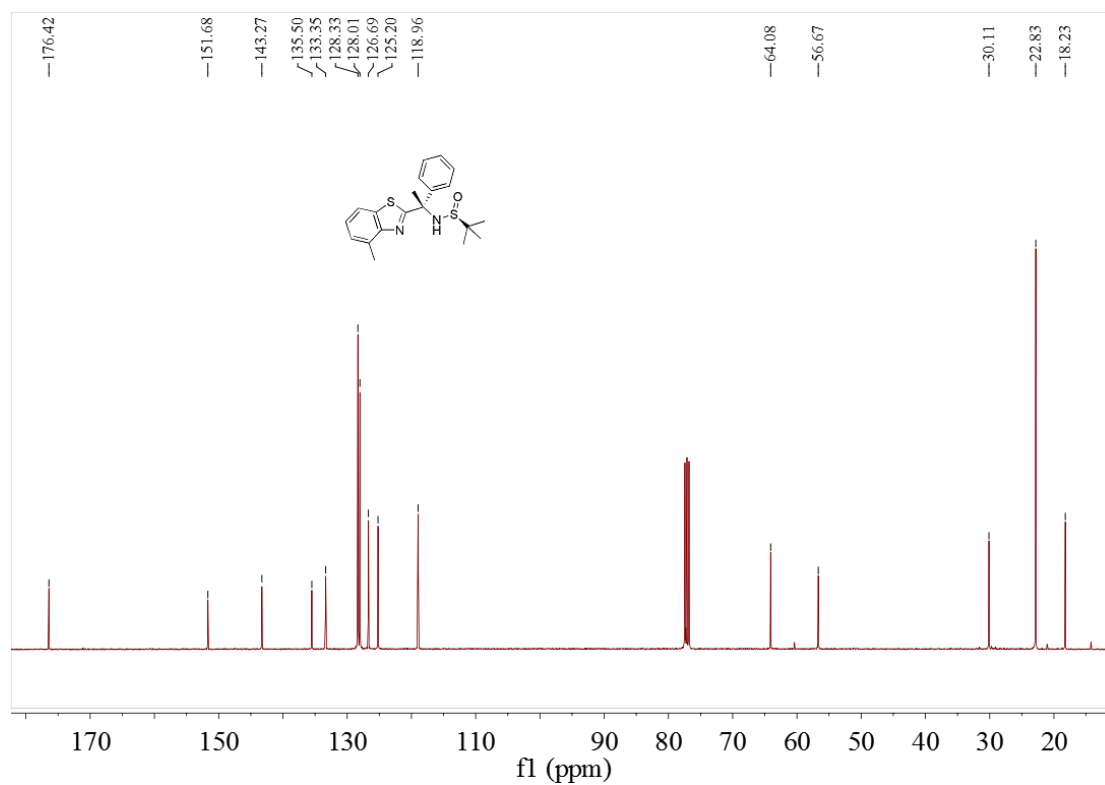

$^1\text{H}$  NMR,  $^{13}\text{C}$  NMR and  $^{19}\text{F}$  NMR of **9b**

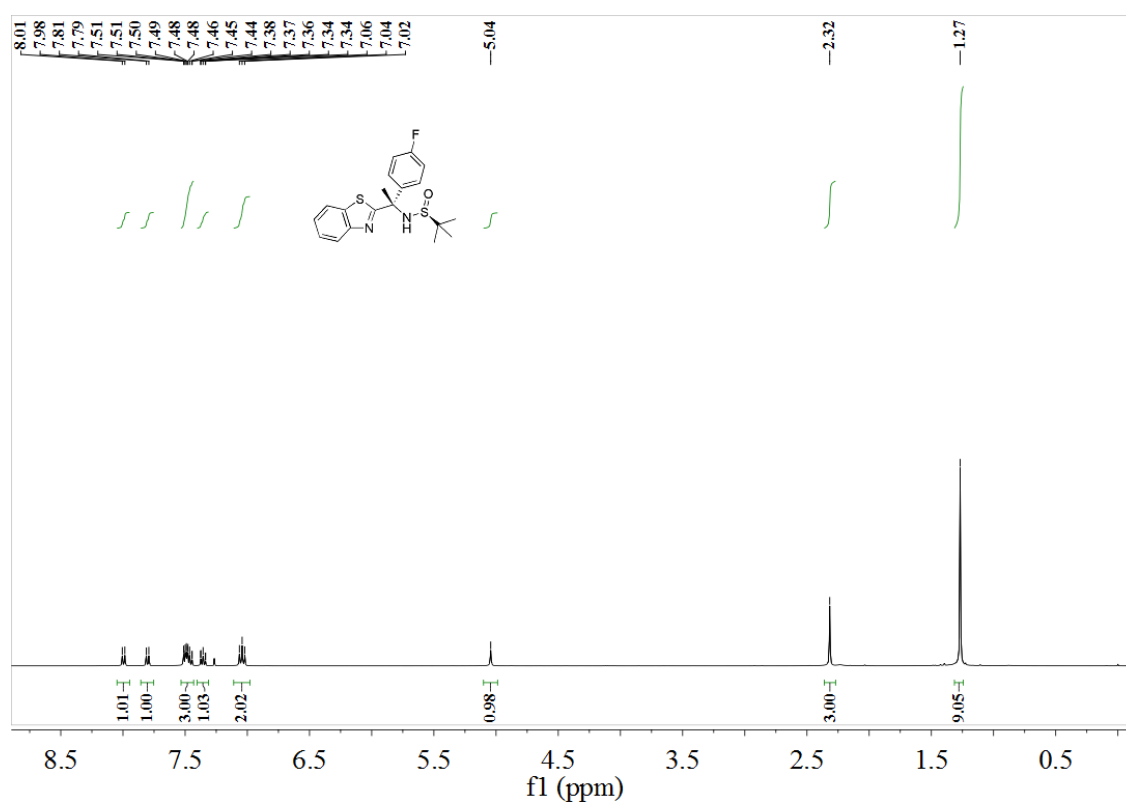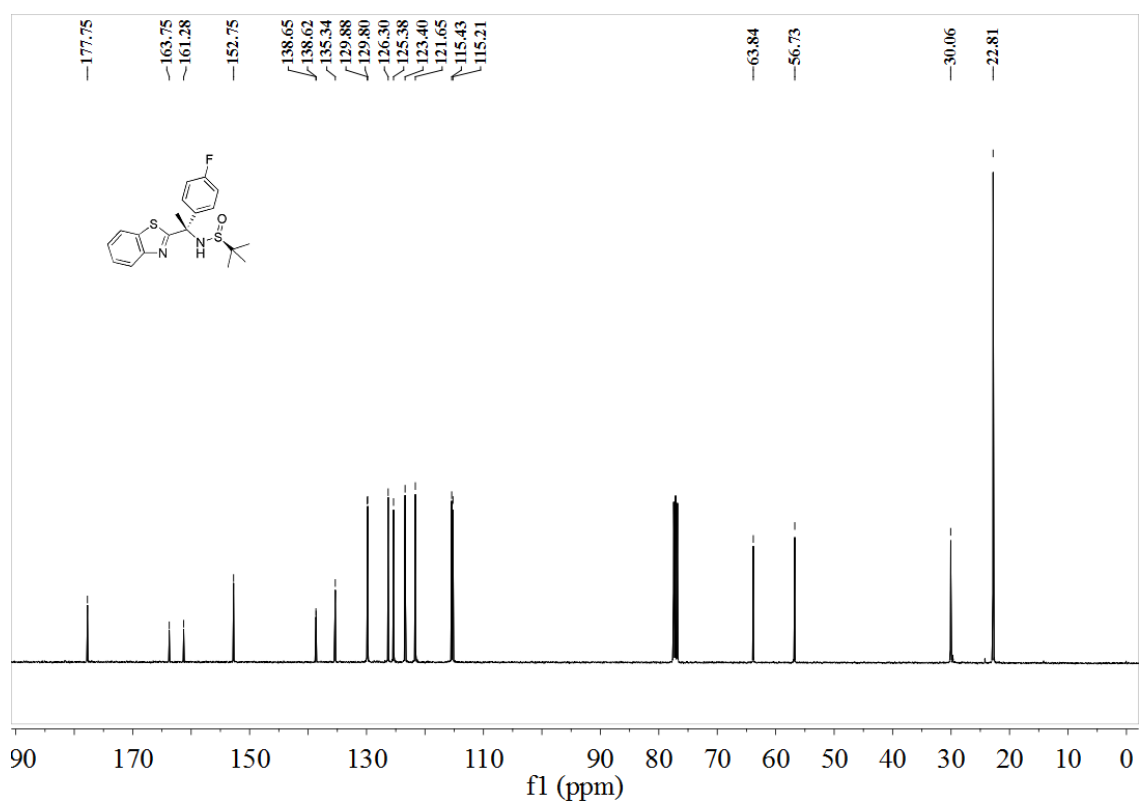

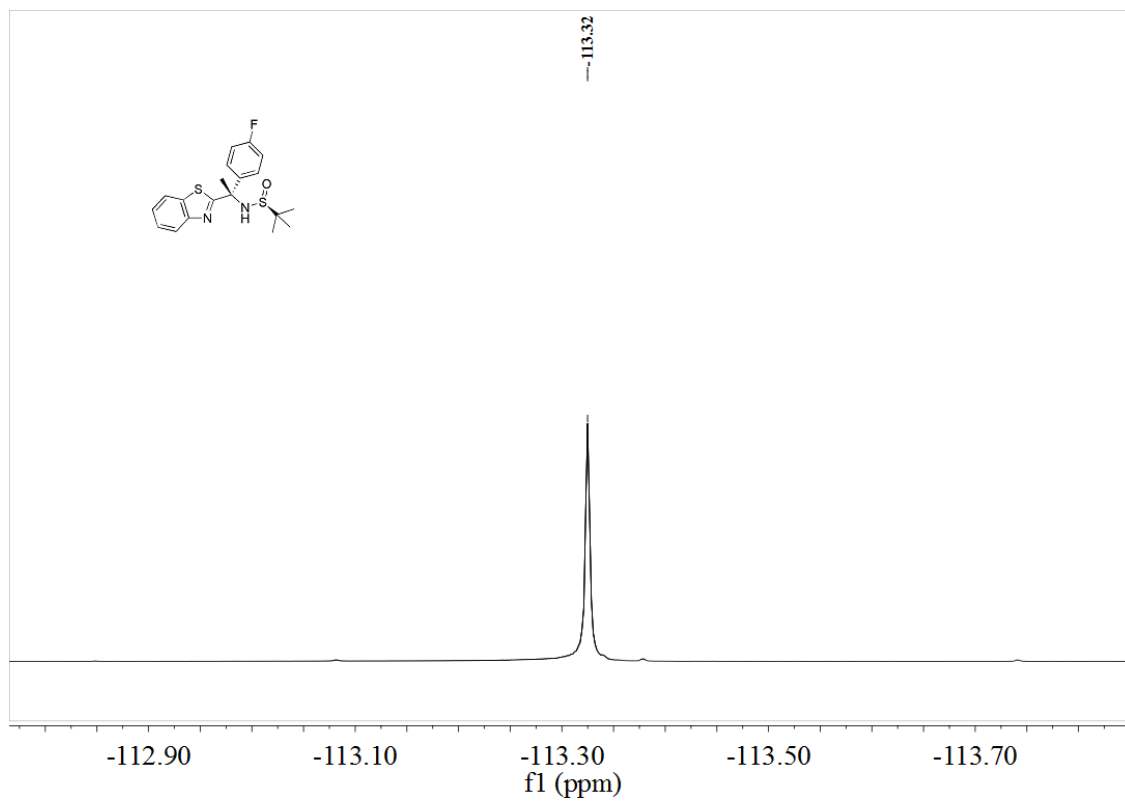

$^1\text{H}$  NMR and  $^{13}\text{C}$  NMR of **9c**

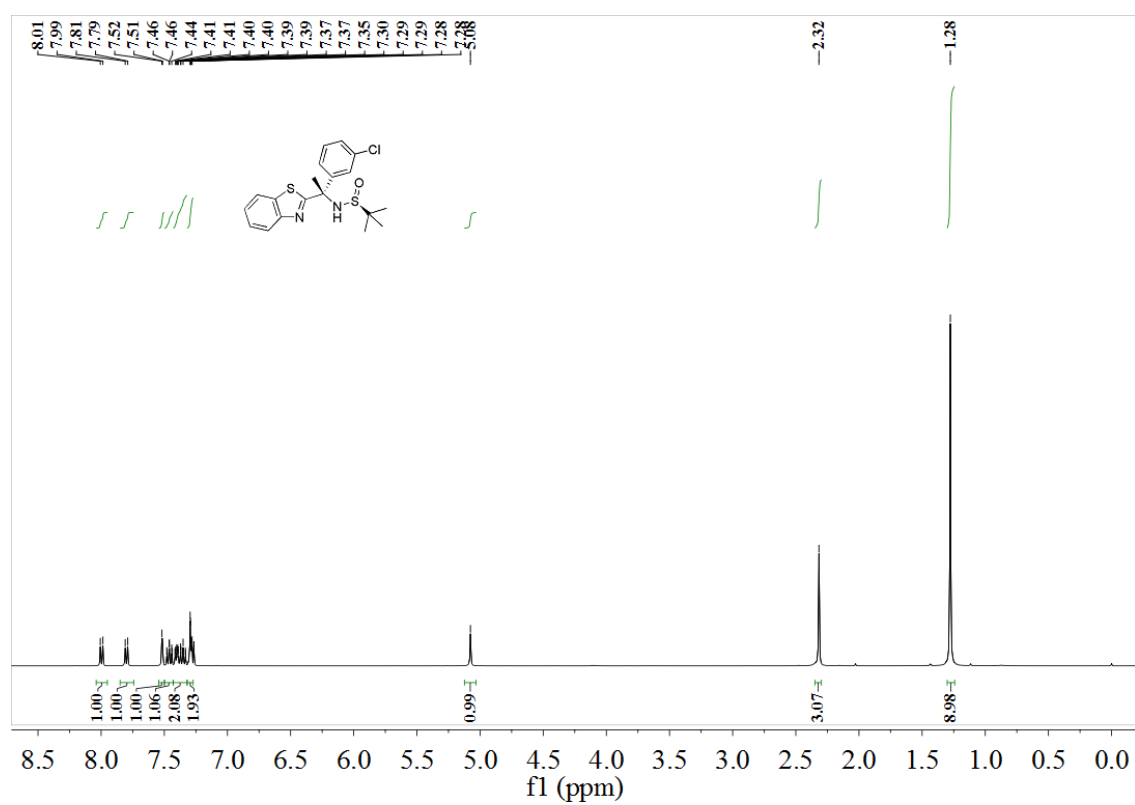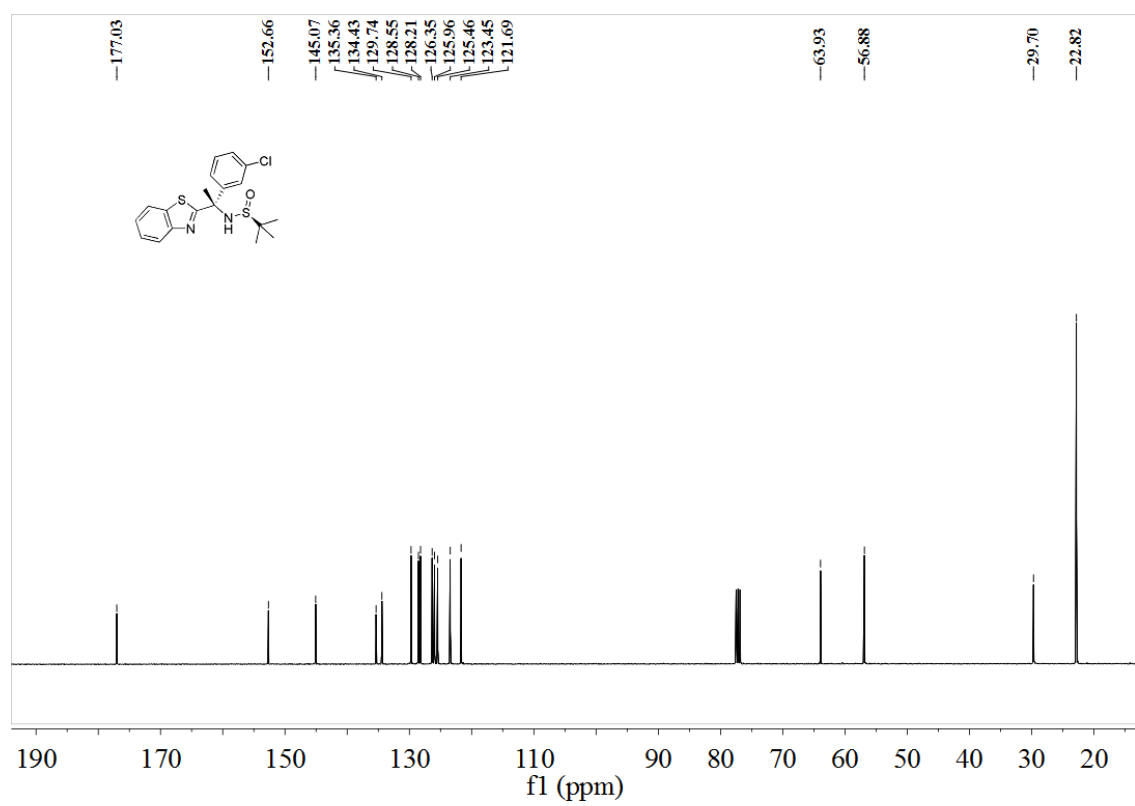

<sup>1</sup>H NMR and <sup>13</sup>C NMR of **9d**

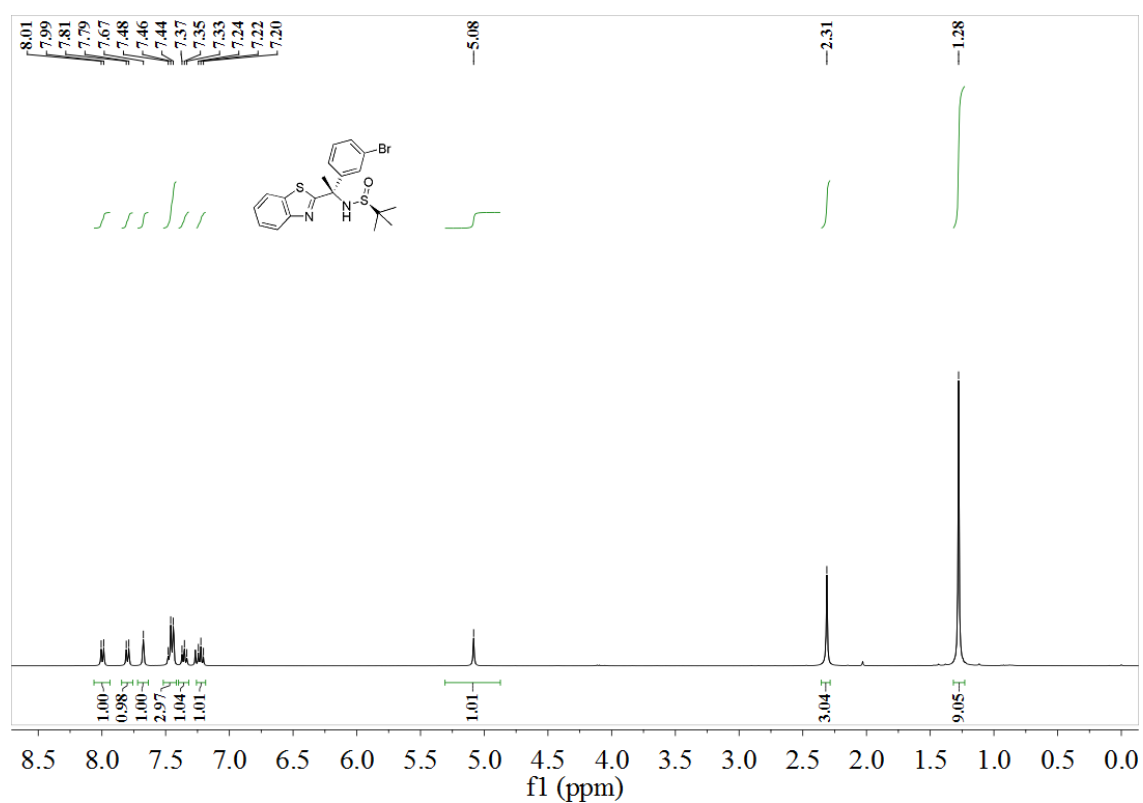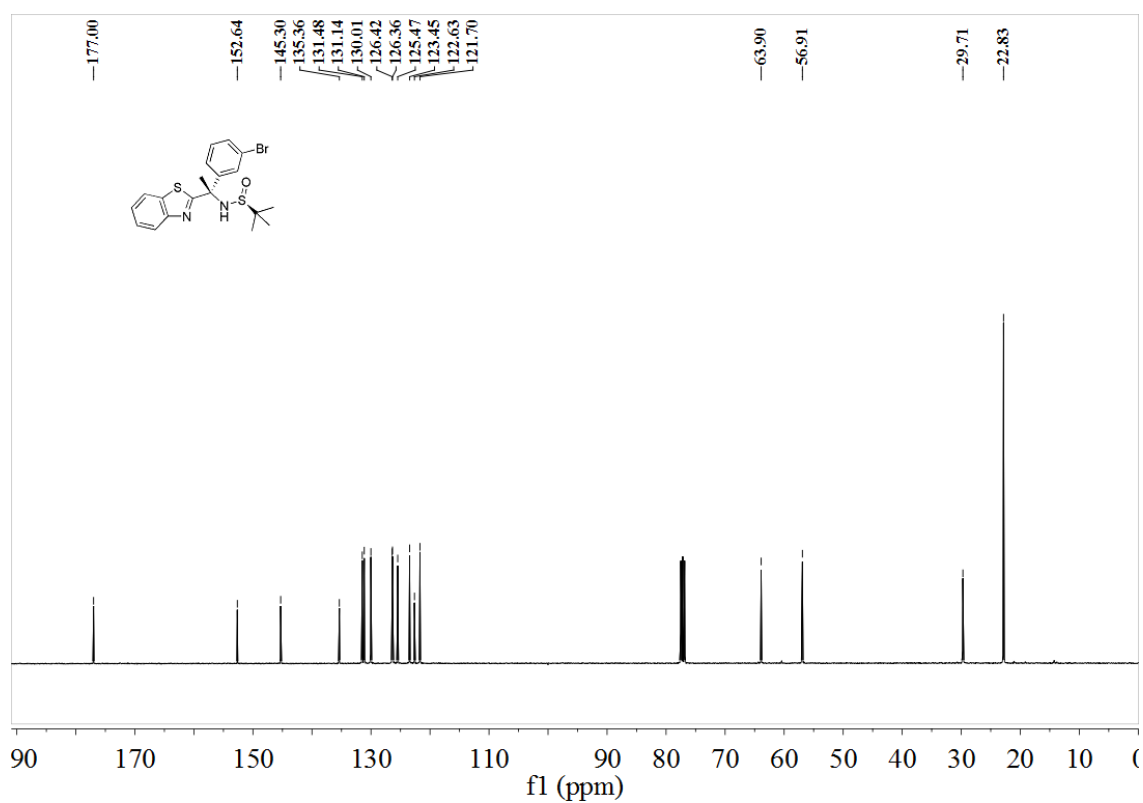



$^1\text{H}$  NMR and  $^{13}\text{C}$  NMR of **9e**

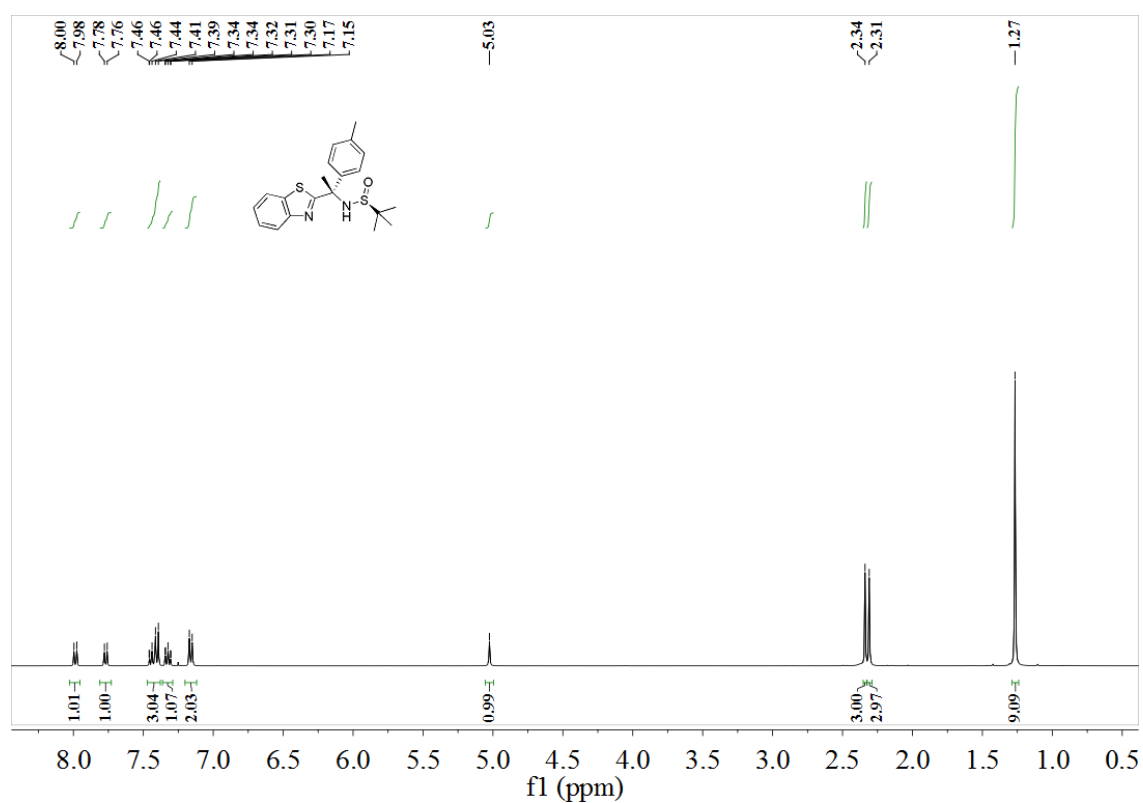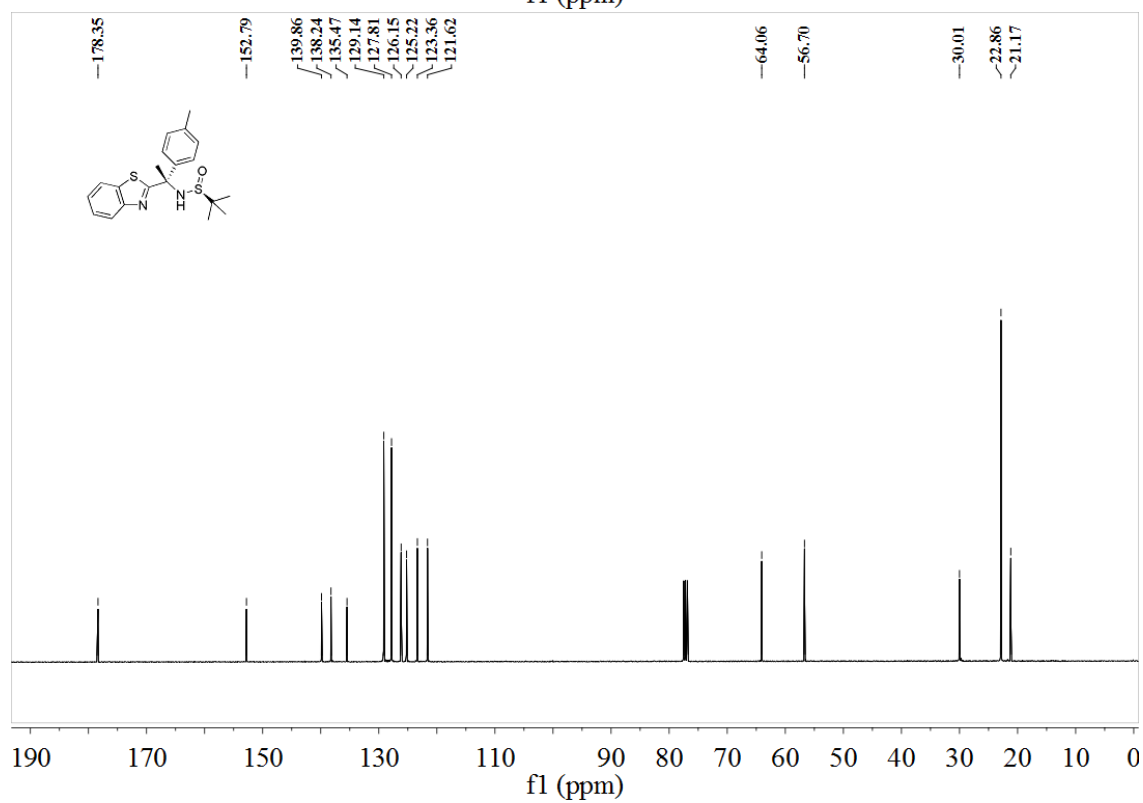

$^1\text{H}$  NMR,  $^{13}\text{C}$  NMR and  $^{19}\text{F}$  NMR of **9f**

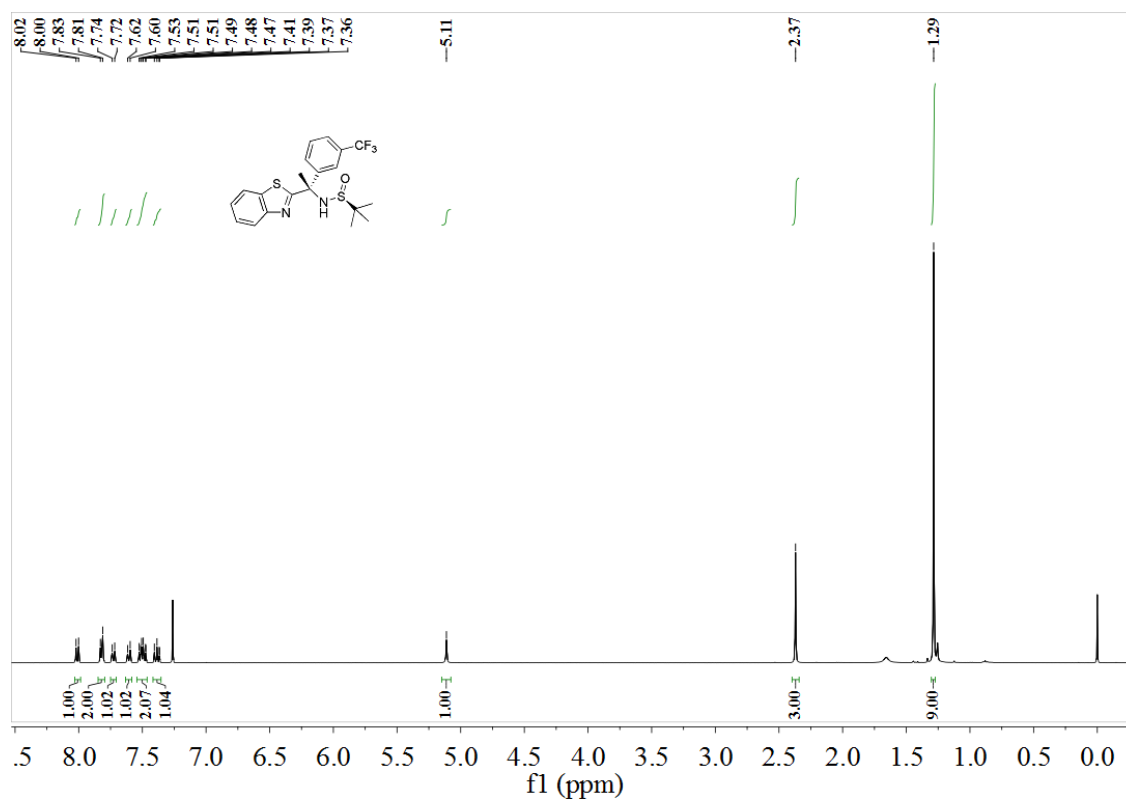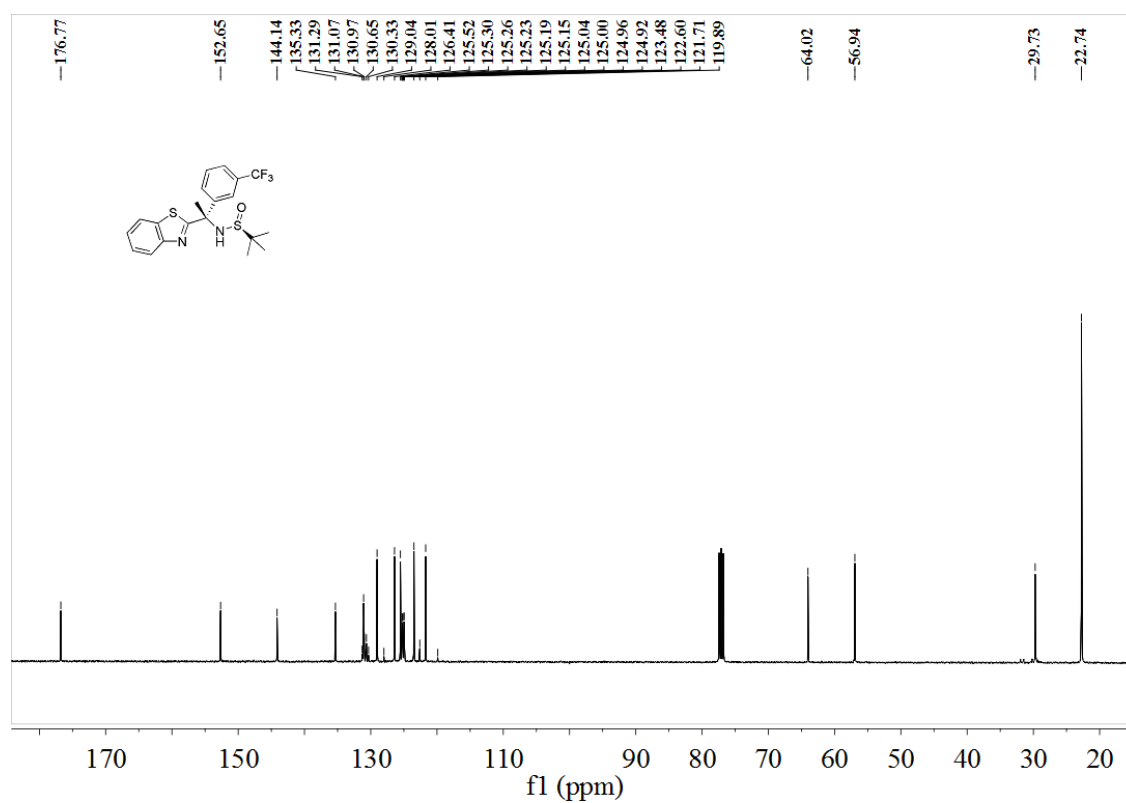

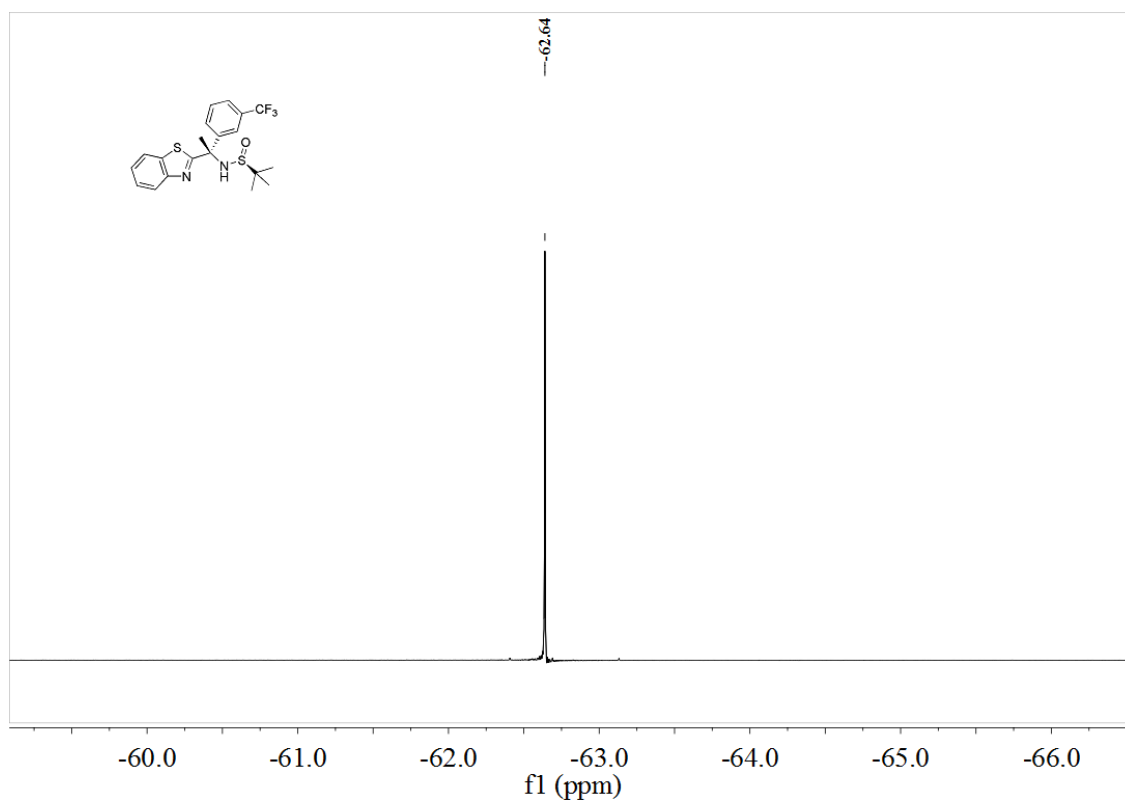

$^1\text{H}$  NMR and  $^{13}\text{C}$  NMR of **9g**

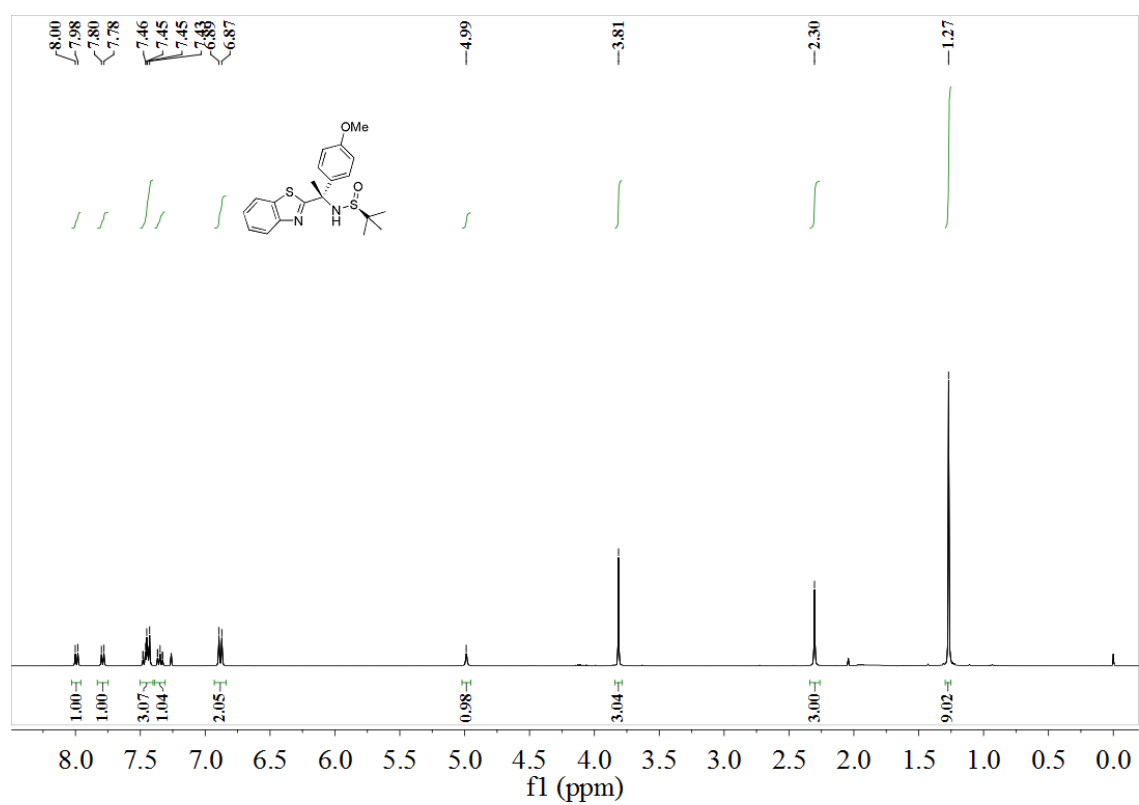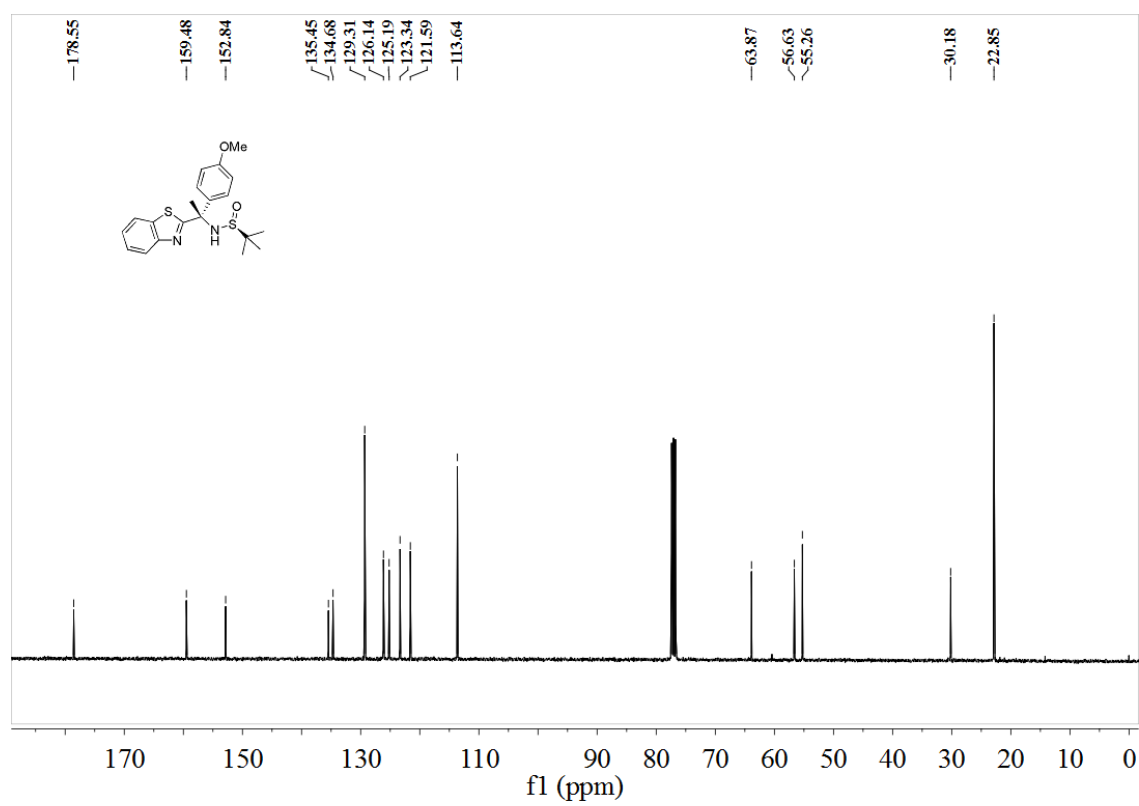

<sup>1</sup>H NMR and <sup>13</sup>C NMR of **9h**

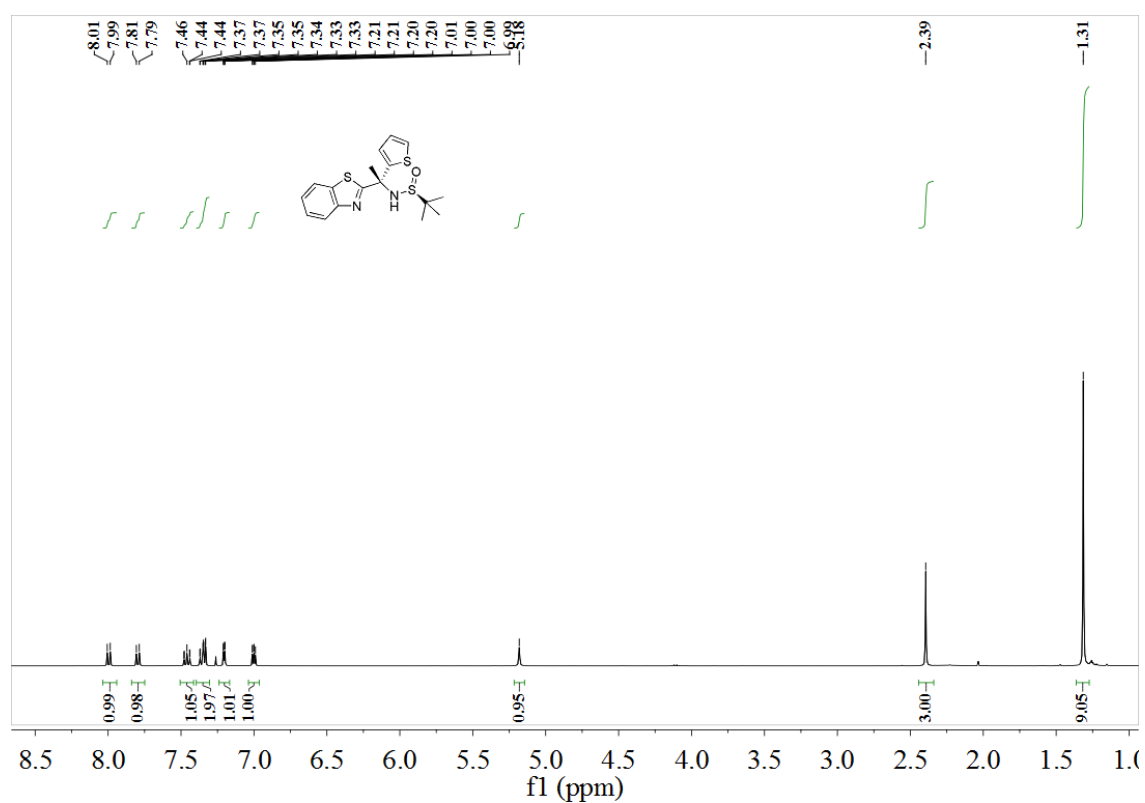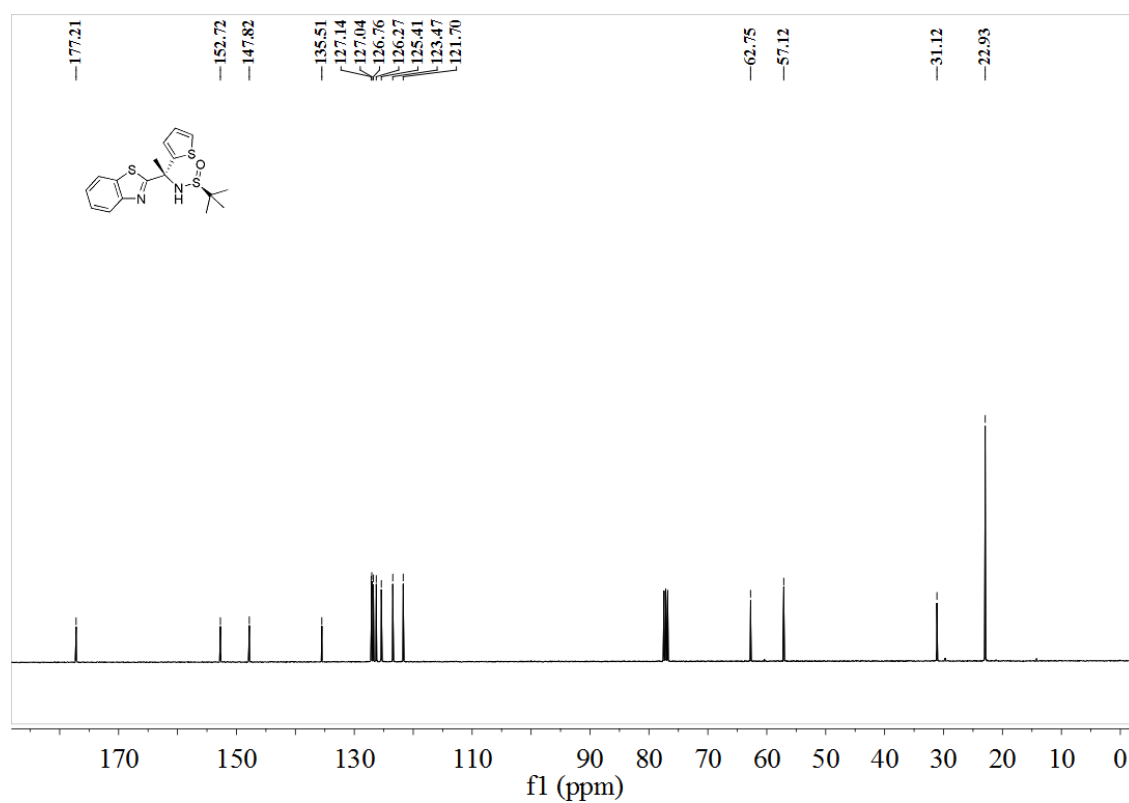

<sup>1</sup>H NMR, <sup>13</sup>C NMR and <sup>19</sup>F NMR of **9i**

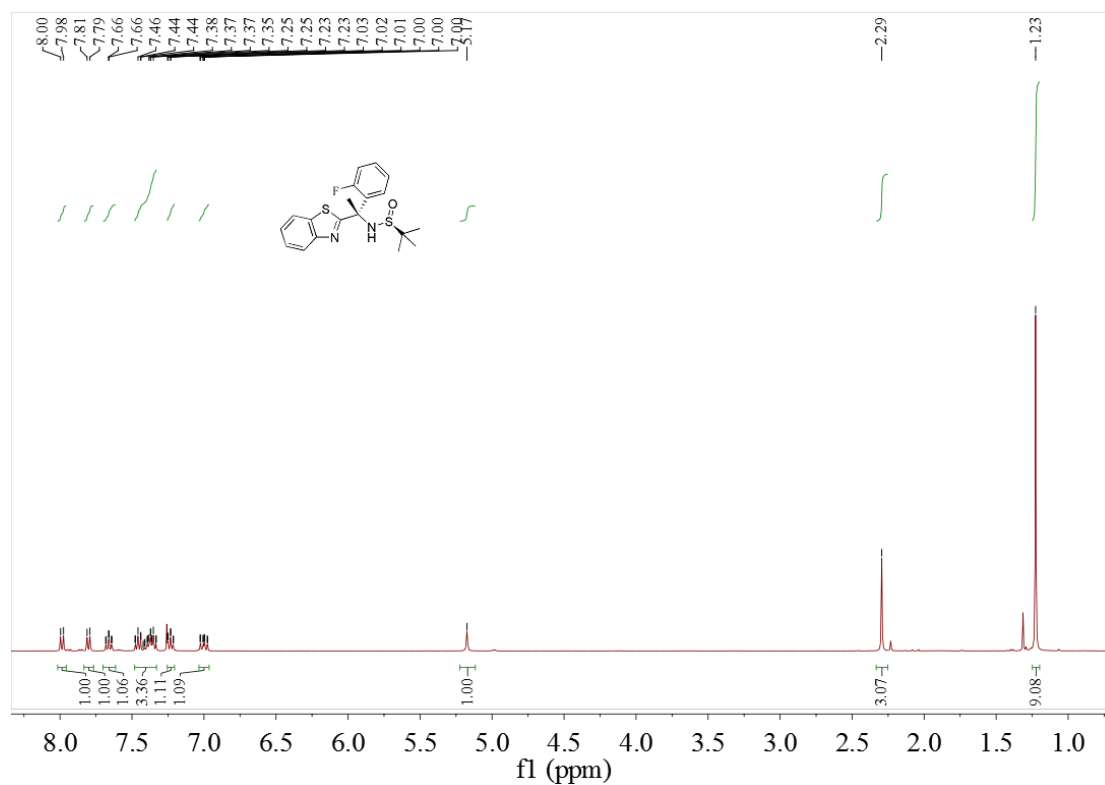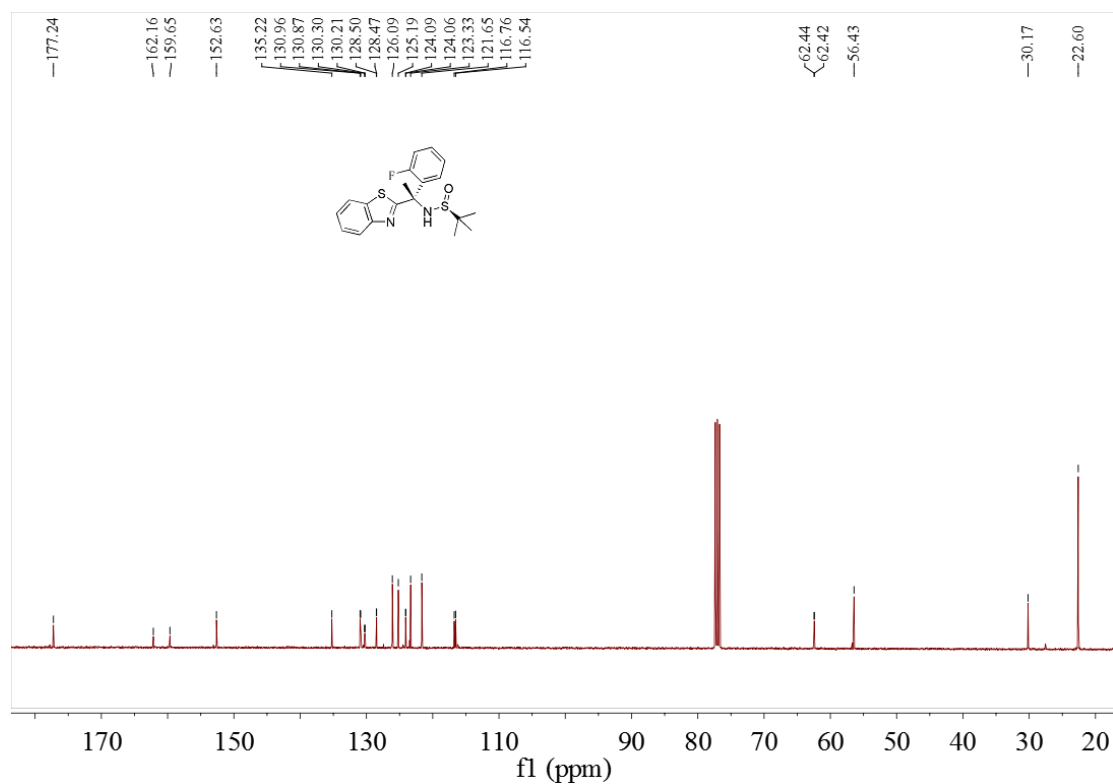

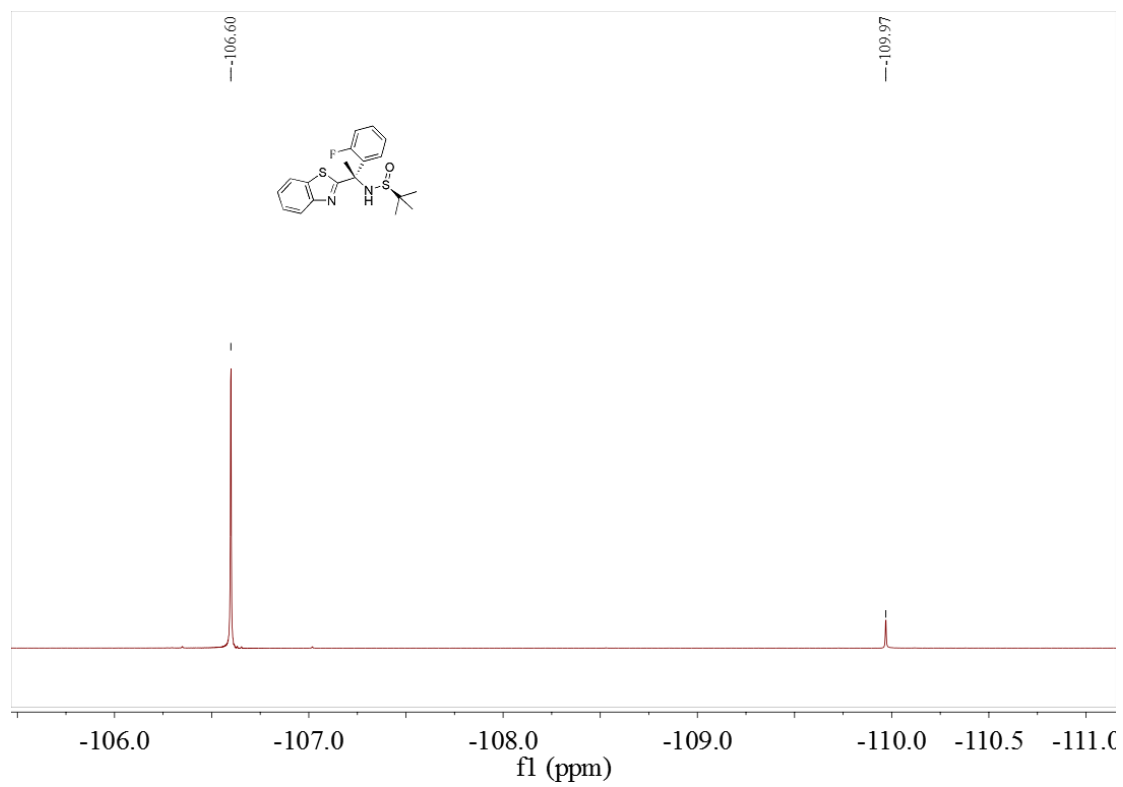

<sup>1</sup>H NMR and <sup>13</sup>C NMR R of 9j

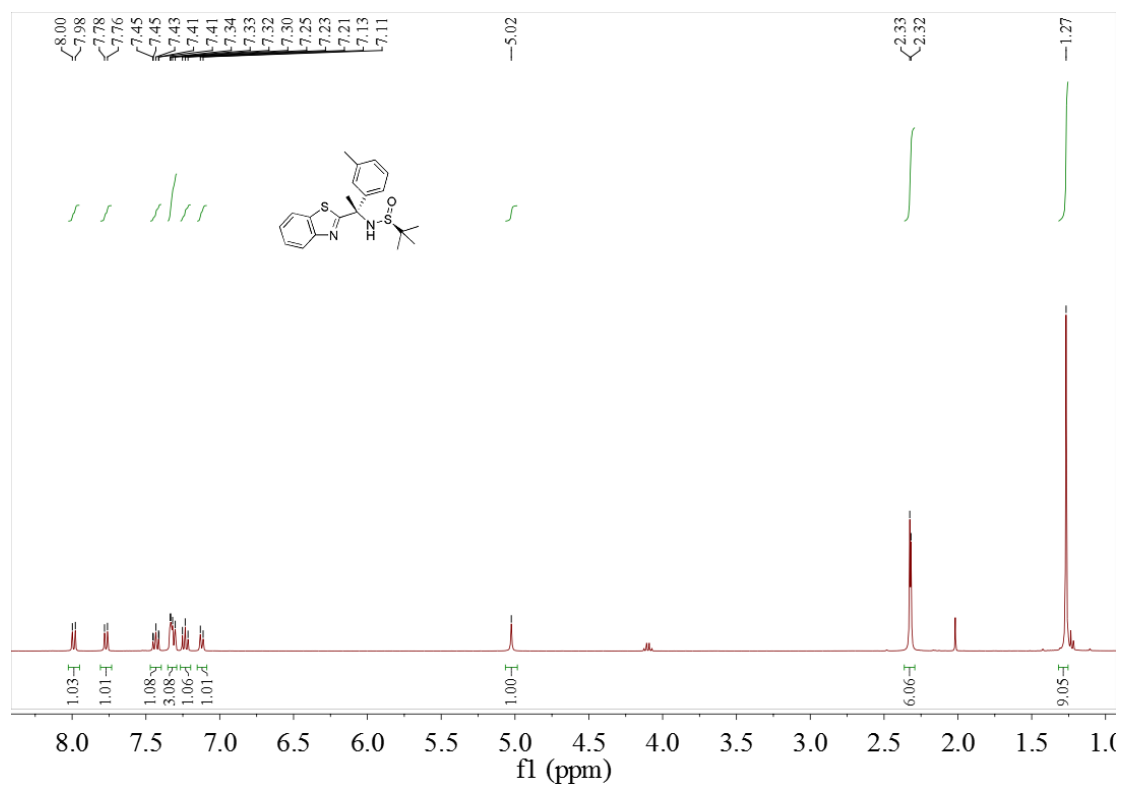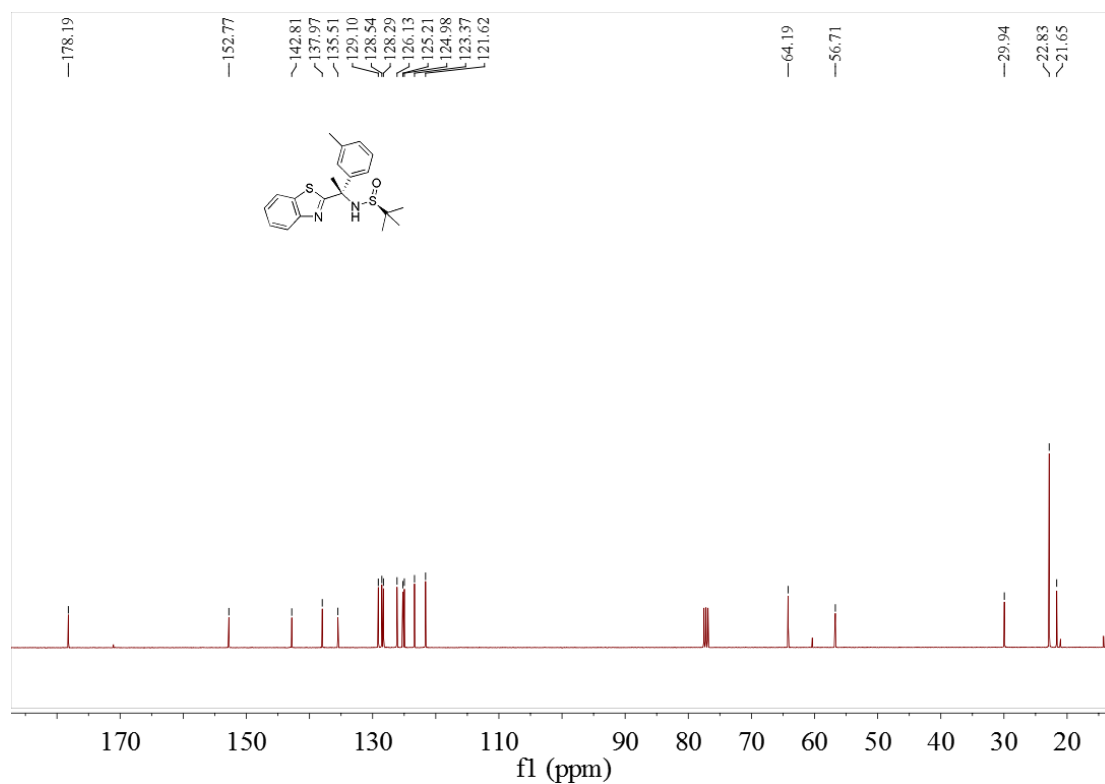



$^1\text{H}$  NMR and  $^{13}\text{C}$  NMR of **10**

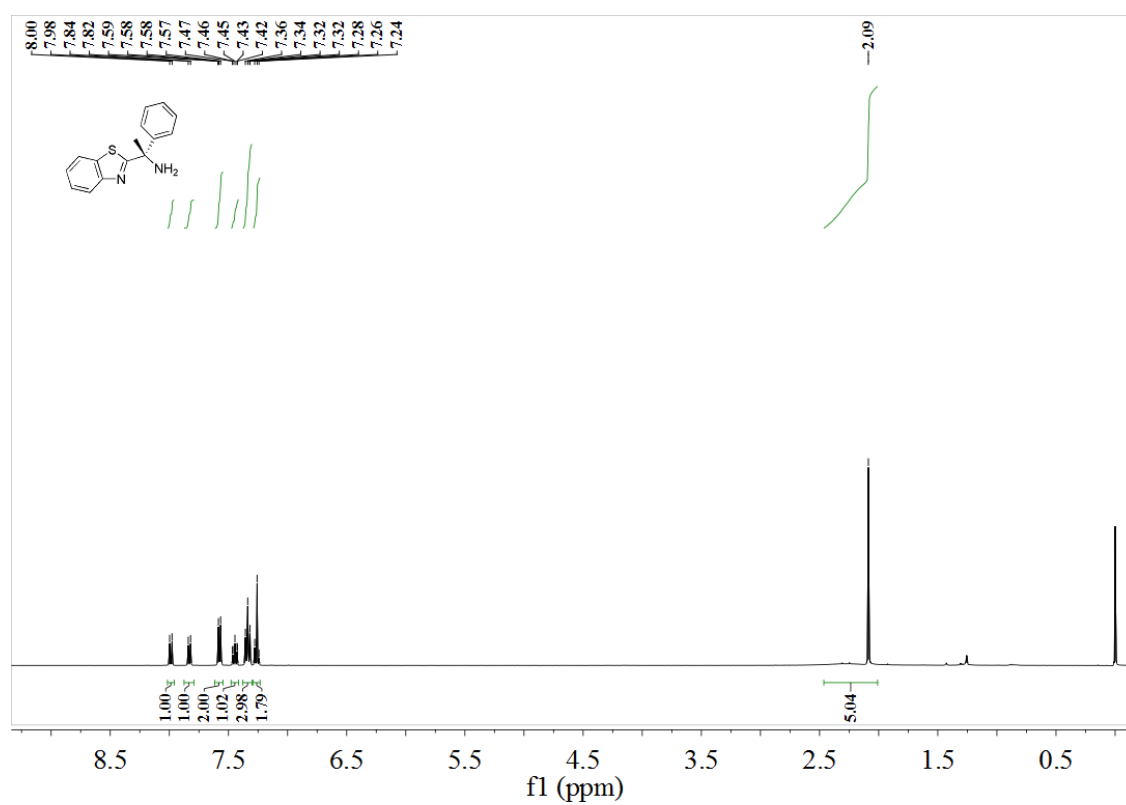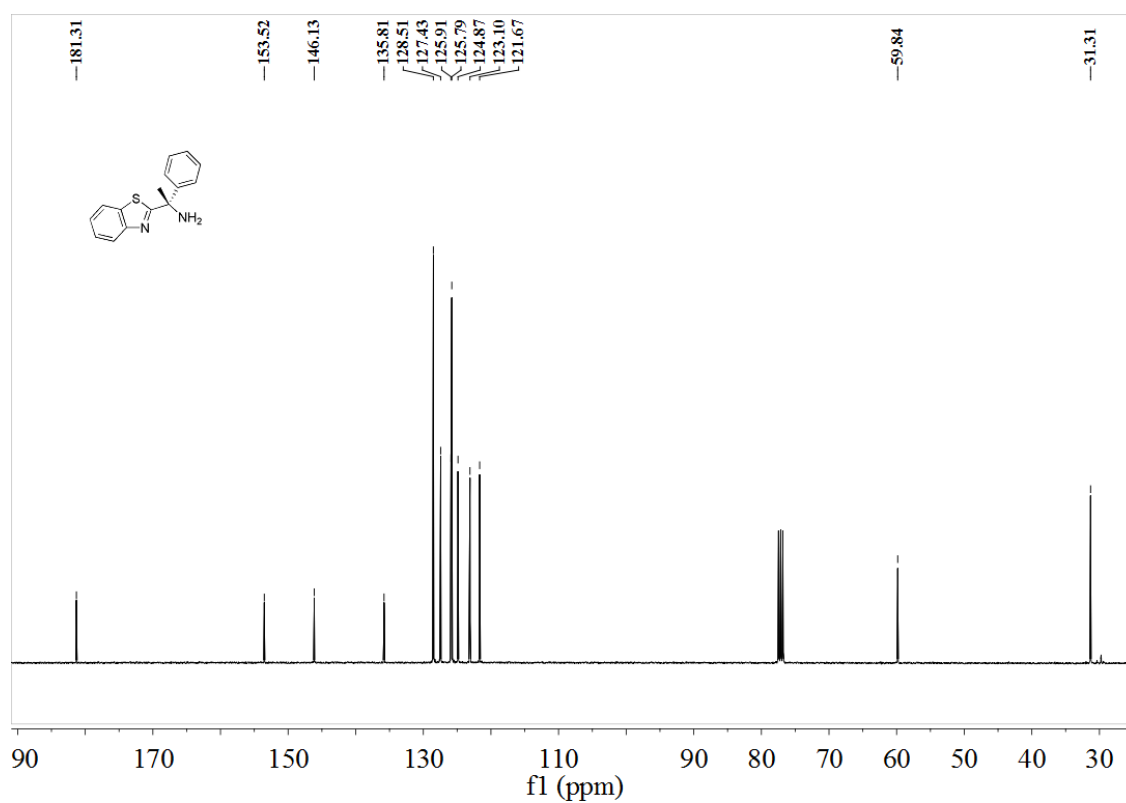

Supplement: c4ra15405c1.pdf [file c4ra15405c1.pdf]
